# Supplementary material for: How stress-related factors affect mental wellbeing of university students A cross-sectional study to explore the associations between stressors, perceived stress, and mental wellbeing
Source: PubMed Central journal article supplement (PMC9639818; doi:10.1371/journal.pone.0275925), 2022-11-07
Supplement: pone.0275925.s001.pdf [file pone.0275925.s001.pdf]

| Subject | Gender  | Age | Year | Mental Wellbeing | Perceived Stress | Academic Stress | Financial Stress | Family Stress | Sideactivity Stress | Avoidance Coping | Approach Coping | Extraversion | Agreeableness | Conscientiousness | Emotionalstability | Openness | SelfEsteem | Loneliness |
|---------|---------|-----|------|------------------|------------------|-----------------|------------------|---------------|---------------------|------------------|-----------------|--------------|---------------|-------------------|--------------------|----------|------------|------------|
| 1       | Male    | 18  | 1    | 48               | 20               | 2,89            | 2,67             | 2             | 3                   | 21               | 24              | 7            | 6             | 10                | 13                 | 9        | 2,9        | 8          |
| 2       | Male    | 18  | 1    | 37               | 26               | 3,17            | 2,5              | 2,5           | 1,6                 | 27               | 30              | 8            | 11            | 7                 | 7                  | 12       | 2,2        | 6          |
| 3       | Male    | 21  | 4    | 53               | 15               | 2,39            | 4,17             | 4             | 3,8                 | 19               | 39              | 7            | 8             | 13                | 13                 | 12       | 3,7        | 7          |
| 4       | Male    | 18  | 1    | 38               | 29               | 3,67            | 4,33             | 5             | 3,4                 | 24               | 33              | 4            | 8             | 9                 | 5                  | 6        | 1,9        | 7          |
| 5       | Male    | 21  | 3    | 41               | 26               | 3,33            | 3,5              | 3,75          | 3,2                 | 25               | 31              | 14           | 9             | 7                 | 10                 | 12       | 3          | 11         |
| 6       | Male    | 21  | 3    | 59               | 2                | 1               | 1,67             | 1             | 1                   | 19               | 40              | 9            | 14            | 14                | 14                 | 13       | 4          | 10         |
| 7       | Female  | 22  | 3    | 26               | 34               | 2,83            | 4,5              | 3             | 3,4                 | 37               | 30              | 10           | 10            | 8                 | 4                  | 11       | 1,8        | 6          |
| 8       | Male    | 32  | 4    | 51               | 12               | 2,33            | 1                | 1,5           | 2,8                 | 22               | 37              | 6            | 6             | 12                | 11                 | 9        | 3,2        | 12         |
| 9       | Female  | 20  | 2    | 49               | 25               | 3,44            | 4,17             | 3,5           | 3,4                 | 21               | 38              | 12           | 6             | 12                | 9                  | 12       | 2,4        | 12         |
| 10      | Male    | 21  | 4    | 46               | 20               | 2,5             | 3,17             | 1,75          | 3                   | 19               | 19              | 5            | 8             | 9                 | 13                 | 7        | 2,8        | 8          |
| 11      | Male    | 22  | 3    | 53               | 15               | 2,06            | 3,33             | 1,25          | 2,8                 | 20               | 35              | 6            | 11            | 14                | 10                 | 10       | 3,1        | 10         |
| 12      | Female  | 20  | 4    | 49               | 28               | 2,44            | 4                | 1,75          | 4,8                 | 18               | 39              | 10           | 10            | 11                | 5                  | 14       | 3          | 10         |
| 13      | Female  | 20  | 1    | 47               | 18               | 3,56            | 1,83             | 4             | 3                   | 26               | 45              | 5            | 7             | 9                 | 6                  | 13       | 2,5        | 9          |
| 14      | Male    | 23  | 4    | 46               | 18               | 2,33            | 1                | 1,5           | 1,6                 | 18               | 31              | 12           | 9             | 11                | 10                 | 12       | 3,3        | 12         |
| 15      | Male    | 18  | 2    | 50               | 14               | 2,94            | 2,67             | 1,75          | 1,6                 | 18               | 33              | 10           | 11            | 7                 | 13                 | 7        | 3,5        | 11         |
| 16      | Female  | 19  | 1    | 49               | 16               | 2,94            | 3,33             | 2,75          | 4                   | 20               | 33              | 2            | 11            | 14                | 10                 | 12       | 3,3        | 9          |
| 17      | Male    | 19  | 1    | 57               | 16               | 1,94            | 1,67             | 1,25          | 1,6                 | 21               | 35              | 12           | 9             | 11                | 8                  | 11       | 2,9        | 12         |
| 18      | Female  | 21  | 4    | 40               | 26               | 2,78            | 3,5              | 3,25          | 4,2                 | 28               | 29              | 8            | 6             | 11                | 6                  | 10       | 2,5        | 7          |
| 19      | Male    | 19  | 2    | 46               | 11               | 2,28            | 3,17             | 1             | 2                   | 18               | 24              | 10           | 4             | 9                 | 12                 | 10       | 3          | 6          |
| 20      | Female  | 21  | 2    | 54               | 20               | 2,28            | 2,5              | 1             | 1,8                 | 18               | 24              | 13           | 8             | 13                | 12                 | 12       | 3,6        | 12         |
| 21      | Male    | 23  | 2    | 42               | 27               | 3,28            | 2,33             | 2             | 2,8                 | 24               | 39              | 10           | 9             | 12                | 9                  | 11       | 3          | 12         |
| 22      | Female  | 22  | 3    | 44               | 20               | 3,17            | 3,67             | 3,25          | 4                   | 24               | 37              | 9            | 9             | 12                | 11                 | 12       | 2,3        | 12         |
| 23      | Male    | 23  | 2    | 55               | 9                | 2,11            | 2,33             | 1             | 1,6                 | 15               | 18              | 4            | 8             | 8                 | 12                 | 11       | 3,2        | 12         |
| 24      | Male    | 24  | 3    | 41               | 21               | 2,94            | 1,67             | 1,5           | 1,4                 | 23               | 25              | 4            | 8             | 10                | 12                 | 8        | 1,8        | 9          |
| 25      | Male    | 24  | 3    | 37               | 8                | 2,94            | 2,5              | 1,5           | 1,2                 | 22               | 30              | 4            | 6             | 13                | 13                 | 9        | 1,9        | 9          |
| 26      | Female  | 22  | 4    | 53               | 17               | 2               | 2,5              | 1,75          | 2,2                 | 24               | 41              | 11           | 10            | 13                | 7                  | 11       | 2,5        | 12         |
| 27      | Female  | 24  | 5+   | 42               | 25               | 3,17            | 3,33             | 3,75          | 2,2                 | 29               | 23              | 3            | 9             | 8                 | 6                  | 7        | 2,1        | 7          |
| 28      | Male    | 19  | 3    | 42               | 21               | 2,11            | 3,83             | 3,5           | 3                   | 26               | 32              | 7            | 7             | 12                | 7                  | 9        | 2          | 8          |
| 29      | Male    | 22  | 4    | 55               | 16               | 3,06            | 2,5              | 2,75          | 2,4                 | 36               | 36              | 7            | 8             | 9                 | 7                  | 8        | 2,5        | 9          |
| 30      | Male    | 22  | 3    | 47               | 25               | 1,83            | 2,83             | 2,75          | 1,2                 | 26               | 44              | 9            | 10            | 14                | 11                 | 13       | 2,7        | 8          |
| 31      | Female  | 21  | 3    | 48               | 30               | 2,78            | 3                | 1,5           | 3,4                 | 26               | 36              | 14           | 8             | 13                | 6                  | 14       | 3,3        | 9          |
| 32      | Male    | 25  | 4    | 35               | 28               | 3               | 3                | 4             | 3,2                 | 28               | 25              | 9            | 7             | 14                | 3                  | 7        | 2,7        | 7          |
| 33      | Female  | 23  | 4    | 62               | 13               | 2,83            | 1,17             | 1,75          | 2,8                 | 20               | 38              | 8            | 8             | 13                | 7                  | 14       | 3,8        | 12         |
| 34      | Neutral | 25  | 4    | 54               | 19               | 2,44            | 2,5              | 1,75          | 2,8                 | 28               | 32              | 8            | 6             | 11                | 6                  | 11       | 2,8        | 9          |
| 35      | Female  | 24  | 1    | 46               | 12               | 2,33            | 3,83             | 1,75          | 3,4                 | 20               | 30              | 7            | 9             | 11                | 11                 | 10       | 3          | 11         |
| 36      | Female  | 17  | 1    | 39               | 29               | 3,5             | 3,5              | 3,75          | 3,4                 | 33               | 29              | 8            | 11            | 4                 | 4                  | 11       | 2,4        | 11         |
| 37      | Male    | 20  | 2    | 46               | 27               | 3               | 1,67             | 1,75          | 3,6                 | 26               | 45              | 11           | 12            | 13                | 13                 | 13       | 3,6        | 8          |
| 38      | Male    | 20  | 4    | 40               | 24               | 2,5             | 2,17             | 2,75          | 3,6                 | 23               | 30              | 10           | 9             | 7                 | 6                  | 10       | 2,8        | 8          |
| 39      | Female  | 18  | 1    | 48               | 11               | 1,89            | 1,83             | 2             | 2,2                 | 18               | 28              | 11           | 13            | 11                | 12                 | 13       | 3          | 9          |
| 40      | Male    | 18  | 1    | 39               | 25               | 3,06            | 3,33             | 2,75          | 3,8                 | 36               | 33              | 6            | 9             | 9                 | 6                  | 10       | 2          | 6          |
| 41      | Male    | 18  | 2    | 56               | 14               | 1,94            | 1,67             | 1             | 1                   | 15               | 22              | 13           | 8             | 12                | 13                 | 14       | 4          | 12         |
| 42      | Male    | 22  | 4    | 44               | 17               | 2,61            | 2                | 1,5           | 3                   | 22               | 38              | 8            | 10            | 12                | 8                  | 12       | 2,8        | 10         |
| 43      | Male    | 17  | 1    | 52               | 19               | 2,83            | 2,33             | 1             | 3,4                 | 23               | 27              | 9            | 8             | 10                | 10                 | 7        | 3          | 8          |
| 44      | Female  | 17  | 1    | 51               | 11               | 2,44            | 2,17             | 1             | 1,8                 | 21               | 35              | 11           | 12            | 11                | 14                 | 13       | 3,8        | 12         |
| 45      | Male    | 21  | 4    | 52               | 20               | 3,22            | 1,33             | 1             | 1                   | 24               | 27              | 10           | 13            | 9                 | 11                 | 7        | 2,5        | 12         |
| 46      | Female  | 20  | 4    | 48               | 26               | 2,61            | 2,67             | 1,25          | 3,4                 | 21               | 33              | 10           | 7             | 13                | 7                  | 10       | 3,6        | 12         |
| 47      | Female  | 19  | 2    | 42               | 21               | 2,94            | 3,83             | 1,75          | 4                   | 31               | 26              | 5            | 9             | 9                 | 10                 | 13       | 2,7        | 9          |
| 48      | Female  | 17  | 1    | 56               | 24               | 2,67            | 1,67             | 1,5           | 3,6                 | 21               | 28              | 7            | 12            | 14                | 8                  | 12       | 3,1        | 8          |
| 49      | Male    | 21  | 3    | 41               | 21               | 2               | 2,5              | 2,25          | 2,4                 | 25               | 26              | 13           | 8             | 12                | 8                  | 12       | 2,3        | 8          |
| 50      | Female  | 24  | 4    | 48               | 23               | 2,89            | 4                | 3,5           | 4,2                 | 20               | 32              | 8            | 8             | 14                | 10                 | 13       | 3,1        | 12         |
| 51      | Female  | 17  | 1    | 47               | 13               | 2,61            | 3,17             | 2,75          | 3,6                 | 21               | 27              | 8            | 12            | 9                 | 5                  | 10       | 3,3        | 12         |
| 52      | Male    | 18  | 1    | 51               | 8                | 2,67            | 3                | 1             | 2,8                 | 20               | 28              | 6            | 9             | 12                | 13                 | 11       | 2,8        | 9          |
| 53      | Male    | 20  | 4    | 48               | 19               | 2,67            | 2,83             | 2,25          | 2,2                 | 24               | 30              | 3            | 8             | 8                 | 9                  | 5        | 2,8        | 9          |
| 54      | Male    | 22  | 1    | 53               | 19               | 2,17            | 1,83             | 2,25          | 3,8                 | 18               | 22              | 4            | 5             | 11                | 8                  | 8        | 3,9        | 7          |
| 55      | Male    | 19  | 1    | 55               | 13               | 2,39            | 1,67             | 1,75          | 2                   | 27               | 32              | 11           | 8             | 14                | 10                 | 8        | 3,5        | 12         |
| 56      | Male    | 25  | 3    | 58               | 20               | 1,44            | 1                | 1             | 1,6                 | 28               | 35              | 10           | 8             | 12                | 13                 | 12       | 3,7        | 12         |
| 57      | Female  | 23  | 1    | 64               | 13               | 1,78            | 2                | 2             | 2                   | 22               | 39              | 13           | 9             | 11                | 12                 | 14       | 3,8        | 12         |
| 58      | Female  | 19  | 1    | 35               | 24               | 3,17            | 3                | 3             | 2,6                 | 28               | 30              | 5            | 8             | 8                 | 6                  | 12       | 1,8        | 8          |
| 59      | Male    | 19  | 2    | 42               | 18               | 3,17            | 2,33             | 3             | 3,6                 | 22               | 32              | 5            | 11            | 6                 | 8                  | 10       | 2,6        | 8          |
| 60      | Female  | 19  | 2    | 62               | 15               | 1,67            | 3,17             | 1,5           | 1,4                 | 21               | 35              | 12           | 7             | 10                | 7                  | 11       | 3,8        | 12         |
| 61      | Male    | 19  | 1    | 54               | 12               | 2,72            | 2,5              | 3             | 1,8                 | 22               | 36              | 13           | 9             | 13                | 11                 | 13       | 3,5        | 9          |
| 62      | Male    | 22  | 3    | 55               | 18               | 1,56            | 3,33             | 1,5           | 3,6                 | 21               | 35              | 8            | 7             | 13                | 10                 | 10       | 3,1        | 7          |

|     |        |    |   |    |    |      |      |      |     |    |    |    |    |    |    |    |     |    |
|-----|--------|----|---|----|----|------|------|------|-----|----|----|----|----|----|----|----|-----|----|
| 63  | Male   | 21 | 1 | 51 | 18 | 3,11 | 1,83 | 2,5  | 2,8 | 17 | 23 | 11 | 10 | 7  | 12 | 9  | 3,2 | 9  |
| 64  | Male   | 20 | 3 | 45 | 23 | 2,11 | 1,17 | 2,25 | 3,4 | 18 | 32 | 6  | 8  | 14 | 13 | 9  | 3,3 | 6  |
| 65  | Male   | 20 | 3 | 44 | 13 | 2,17 | 1,67 | 1,25 | 1,8 | 25 | 35 | 9  | 8  | 12 | 11 | 11 | 3,2 | 12 |
| 66  | Female | 20 | 1 | 60 | 8  | 2,06 | 3    | 1,75 | 2,2 | 21 | 38 | 9  | 9  | 14 | 13 | 14 | 2,8 | 11 |
| 67  | Male   | 20 | 2 | 51 | 12 | 2,22 | 2,5  | 2,5  | 2,4 | 23 | 38 | 9  | 7  | 9  | 13 | 13 | 3,2 | 12 |
| 68  | Male   | 19 | 1 | 60 | 8  | 2,33 | 1,67 | 1,25 | 1,4 | 29 | 43 | 13 | 10 | 12 | 12 | 13 | 3,4 | 12 |
| 69  | Male   | 20 | 4 | 58 | 11 | 1,78 | 1    | 1    | 1   | 17 | 29 | 11 | 7  | 10 | 11 | 11 | 3,4 | 10 |
| 70  | Male   | 19 | 1 | 58 | 9  | 2,39 | 4    | 4    | 3,6 | 20 | 31 | 7  | 7  | 11 | 13 | 11 | 3   | 9  |
| 71  | Male   | 21 | 4 | 53 | 14 | 2,61 | 2,5  | 3,5  | 2,2 | 25 | 39 | 3  | 8  | 11 | 10 | 11 | 3,6 | 12 |
| 72  | Male   | 18 | 2 | 56 | 22 | 2,56 | 1,67 | 1,75 | 1,4 | 30 | 32 | 9  | 5  | 11 | 9  | 10 | 2,5 | 11 |
| 73  | Male   | 18 | 1 | 55 | 11 | 2,44 | 1    | 1    | 1   | 17 | 27 | 8  | 9  | 12 | 11 | 10 | 3,7 | 11 |
| 74  | Male   | 21 | 4 | 43 | 16 | 2,22 | 2,33 | 1    | 2,4 | 26 | 28 | 11 | 7  | 7  | 11 | 9  | 2,8 | 12 |
| 75  | Female | 29 | 4 | 34 | 21 | 2,83 | 1    | 1    | 1   | 19 | 30 | 4  | 11 | 12 | 6  | 9  | 2,9 | 9  |
| 76  | Male   | 18 | 1 | 53 | 13 | 3    | 3,33 | 2,25 | 2,6 | 22 | 31 | 7  | 10 | 9  | 13 | 10 | 3,1 | 10 |
| 77  | Male   | 21 | 3 | 43 | 24 | 1,56 | 2,67 | 2,5  | 2,8 | 21 | 35 | 4  | 8  | 14 | 8  | 11 | 3,2 | 9  |
| 78  | Male   | 19 | 1 | 58 | 15 | 2,22 | 4    | 3    | 3,6 | 15 | 28 | 11 | 6  | 8  | 7  | 10 | 2,7 | 12 |
| 79  | Female | 19 | 2 | 51 | 24 | 2,44 | 3    | 2,5  | 1   | 33 | 41 | 8  | 10 | 11 | 5  | 13 | 2,8 | 11 |
| 80  | Male   | 23 | 2 | 52 | 20 | 2,17 | 3,17 | 1    | 1,2 | 17 | 30 | 6  | 8  | 14 | 14 | 9  | 3,6 | 12 |
| 81  | Male   | 19 | 1 | 56 | 19 | 2,94 | 2,67 | 2    | 3,4 | 29 | 38 | 9  | 9  | 14 | 11 | 12 | 2,5 | 9  |
| 82  | Male   | 22 | 4 | 53 | 12 | 1,83 | 3,17 | 1,25 | 1   | 20 | 38 | 11 | 9  | 9  | 9  | 13 | 3,1 | 8  |
| 83  | Male   | 21 | 4 | 37 | 19 | 2,94 | 2    | 2,5  | 3,4 | 22 | 24 | 9  | 9  | 10 | 12 | 9  | 2,7 | 8  |
| 84  | Male   | 25 | 4 | 44 | 16 | 2,83 | 2    | 1,25 | 3,2 | 14 | 23 | 8  | 7  | 12 | 11 | 8  | 2,9 | 12 |
| 85  | Male   | 24 | 4 | 56 | 20 | 2,11 | 2    | 2    | 2   | 16 | 30 | 8  | 8  | 8  | 8  | 8  | 3   | 9  |
| 86  | Male   | 23 | 4 | 62 | 10 | 1,44 | 2,83 | 2    | 1,8 | 21 | 37 | 8  | 9  | 13 | 13 | 14 | 3,7 | 11 |
| 87  | Male   | 33 | 4 | 31 | 30 | 2,56 | 1,67 | 2,75 | 3   | 25 | 24 | 8  | 5  | 8  | 3  | 8  | 2,3 | 3  |
| 88  | Male   | 21 | 4 | 31 | 25 | 3,33 | 3,67 | 2    | 2,4 | 27 | 23 | 8  | 8  | 9  | 7  | 9  | 2,5 | 10 |
| 89  | Female | 22 | 4 | 35 | 31 | 3,28 | 4,33 | 4,25 | 3,8 | 29 | 33 | 6  | 9  | 7  | 2  | 12 | 2,2 | 9  |
| 90  | Female | 20 | 1 | 33 | 23 | 3,11 | 1    | 1,25 | 3   | 22 | 19 | 2  | 9  | 8  | 6  | 6  | 2,4 | 11 |
| 91  | Male   | 20 | 2 | 50 | 17 | 2,28 | 2,5  | 2,5  | 2,2 | 21 | 30 | 7  | 9  | 13 | 12 | 11 | 2,9 | 9  |
| 92  | Male   | 21 | 1 | 43 | 19 | 2,61 | 1,67 | 3    | 3   | 20 | 33 | 10 | 12 | 12 | 10 | 12 | 3,2 | 9  |
| 93  | Male   | 21 | 4 | 55 | 20 | 3,22 | 4    | 3,5  | 3,8 | 36 | 31 | 10 | 8  | 9  | 10 | 9  | 2,7 | 9  |
| 94  | Male   | 21 | 4 | 58 | 5  | 2,39 | 2,17 | 3    | 1,8 | 20 | 38 | 9  | 7  | 12 | 12 | 12 | 3,3 | 12 |
| 95  | Male   | 17 | 1 | 59 | 11 | 2,17 | 1,17 | 1    | 1   | 20 | 36 | 9  | 9  | 12 | 12 | 11 | 3,6 | 11 |
| 96  | Male   | 20 | 2 | 54 | 12 | 2,83 | 1,83 | 2,25 | 1,8 | 24 | 34 | 12 | 8  | 7  | 12 | 11 | 3,2 | 7  |
| 97  | Male   | 22 | 4 | 55 | 10 | 1,56 | 1,17 | 1    | 1,2 | 22 | 33 | 9  | 8  | 14 | 13 | 10 | 3,2 | 11 |
| 98  | Male   | 19 | 1 | 56 | 13 | 1,56 | 1    | 1,75 | 2,2 | 24 | 39 | 6  | 7  | 9  | 14 | 13 | 3,6 | 7  |
| 99  | Male   | 20 | 4 | 55 | 13 | 2    | 1,17 | 2    | 1,4 | 18 | 28 | 7  | 6  | 13 | 7  | 6  | 3,1 | 9  |
| 100 | Male   | 21 | 4 | 45 | 21 | 2,61 | 2,5  | 2    | 3   | 20 | 20 | 9  | 9  | 10 | 7  | 10 | 3   | 8  |
| 101 | Male   | 21 | 4 | 47 | 20 | 2,83 | 4    | 4    | 4   | 28 | 33 | 11 | 7  | 9  | 8  | 9  | 2,7 | 9  |
| 102 | Male   | 19 | 3 | 42 | 13 | 2,67 | 3,5  | 3    | 3,8 | 20 | 24 | 4  | 8  | 11 | 14 | 14 | 2,6 | 4  |
| 103 | Male   | 22 | 3 | 30 | 32 | 3,17 | 3,5  | 3,25 | 3   | 23 | 22 | 2  | 9  | 7  | 7  | 9  | 2,2 | 3  |
| 104 | Male   | 18 | 2 | 54 | 18 | 2,94 | 2,5  | 2,25 | 3,2 | 24 | 32 | 8  | 6  | 11 | 10 | 10 | 2,8 | 8  |
| 105 | Male   | 22 | 4 | 50 | 19 | 2,56 | 2,33 | 2,75 | 3,4 | 27 | 40 | 4  | 10 | 10 | 12 | 10 | 3,3 | 8  |
| 106 | Male   | 37 | 2 | 66 | 9  | 2,17 | 2    | 2    | 2,4 | 26 | 40 | 8  | 9  | 8  | 14 | 13 | 3,9 | 10 |
| 107 | Male   | 20 | 1 | 57 | 17 | 2,39 | 3,67 | 4    | 1,8 | 31 | 39 | 12 | 8  | 10 | 7  | 8  | 2,5 | 8  |
| 108 | Male   | 20 | 1 | 46 | 25 | 2,94 | 3,5  | 3,25 | 3,4 | 29 | 36 | 12 | 8  | 6  | 11 | 7  | 2,3 | 8  |
| 109 | Male   | 22 | 1 | 46 | 18 | 2,33 | 3,33 | 1    | 3,6 | 21 | 30 | 7  | 14 | 12 | 11 | 10 | 3,1 | 7  |
| 110 | Male   | 21 | 3 | 55 | 28 | 2,89 | 2,67 | 2,75 | 2,6 | 28 | 36 | 7  | 7  | 12 | 10 | 8  | 2,8 | 10 |
| 111 | Female | 19 | 3 | 40 | 24 | 3,5  | 4,17 | 3,75 | 5   | 25 | 39 | 9  | 5  | 11 | 8  | 8  | 2,5 | 8  |
| 112 | Female | 23 | 3 | 56 | 15 | 2,33 | 3,67 | 3    | 2,2 | 23 | 33 | 11 | 7  | 14 | 10 | 12 | 3,2 | 9  |
| 113 | Male   | 19 | 3 | 48 | 21 | 2,28 | 2,5  | 2,25 | 3,8 | 22 | 34 | 7  | 7  | 9  | 8  | 9  | 3,4 | 9  |
| 114 | Female | 22 | 1 | 44 | 26 | 3,56 | 4    | 3    | 4   | 26 | 32 | 11 | 6  | 13 | 12 | 8  | 2,9 | 8  |
| 115 | Male   | 19 | 1 | 53 | 15 | 2,39 | 2    | 2,5  | 2   | 25 | 30 | 7  | 4  | 11 | 12 | 14 | 2,9 | 9  |
| 116 | Female | 17 | 1 | 57 | 8  | 2,22 | 1,83 | 1,25 | 1,2 | 24 | 36 | 6  | 8  | 14 | 11 | 13 | 2,9 | 10 |
| 117 | Male   | 19 | 3 | 45 | 22 | 3,17 | 2,5  | 1,5  | 1,8 | 20 | 34 | 14 | 8  | 9  | 12 | 11 | 3,2 | 9  |
| 118 | Female | 18 | 3 | 56 | 13 | 2,56 | 3,17 | 2    | 4,2 | 19 | 24 | 12 | 6  | 14 | 10 | 10 | 3,3 | 11 |
| 119 | Male   | 20 | 1 | 53 | 14 | 1,89 | 3,5  | 2,5  | 2,6 | 23 | 28 | 12 | 7  | 13 | 8  | 11 | 3   | 6  |
| 120 | Female | 18 | 1 | 50 | 16 | 2,56 | 2,67 | 1,25 | 3,6 | 17 | 27 | 10 | 9  | 11 | 8  | 9  | 3   | 9  |
| 121 | Female | 27 | 4 | 41 | 23 | 2,89 | 3    | 2,5  | 4,2 | 33 | 35 | 10 | 7  | 9  | 9  | 12 | 2,9 | 10 |
| 122 | Female | 19 | 3 | 47 | 22 | 3    | 3,5  | 4,25 | 3,2 | 21 | 32 | 9  | 7  | 12 | 5  | 11 | 2,7 | 7  |
| 123 | Female | 18 | 3 | 66 | 12 | 1,61 | 1,17 | 1    | 1   | 23 | 44 | 14 | 7  | 10 | 8  | 14 | 3,5 | 12 |
| 124 | Male   | 21 | 4 | 37 | 14 | 2,56 | 1,17 | 3,25 | 2,4 | 24 | 29 | 5  | 9  | 8  | 9  | 12 | 3,2 | 3  |
| 125 | Female | 19 | 3 | 55 | 27 | 2,56 | 2,67 | 2    | 4,4 | 23 | 40 | 8  | 8  | 8  | 7  | 12 | 2,9 | 7  |
| 126 | Female | 20 | 3 | 53 | 16 | 1,94 | 3    | 2,25 | 2,2 | 23 | 33 | 11 | 7  | 12 | 7  | 11 | 2,9 | 8  |

|     |        |    |    |    |    |      |      |      |     |    |    |    |    |    |    |    |     |    |
|-----|--------|----|----|----|----|------|------|------|-----|----|----|----|----|----|----|----|-----|----|
| 127 | Male   | 20 | 1  | 49 | 21 | 2,17 | 3,17 | 2    | 4   | 19 | 42 | 10 | 8  | 10 | 12 | 14 | 3,7 | 11 |
| 128 | Female | 22 | 1  | 48 | 25 | 3,28 | 5    | 3,5  | 4,8 | 28 | 33 | 9  | 8  | 9  | 6  | 13 | 2,5 | 9  |
| 129 | Female | 22 | 4  | 55 | 13 | 2,61 | 3,5  | 2,5  | 2,6 | 21 | 33 | 4  | 8  | 12 | 12 | 8  | 3,3 | 9  |
| 130 | Female | 22 | 3  | 55 | 23 | 3,39 | 4,33 | 4,5  | 4   | 24 | 33 | 7  | 9  | 10 | 5  | 10 | 2,8 | 12 |
| 131 | Female | 17 | 1  | 46 | 26 | 3,17 | 2    | 3,5  | 3,2 | 28 | 30 | 8  | 8  | 12 | 3  | 11 | 2,2 | 8  |
| 132 | Female | 19 | 1  | 49 | 23 | 1,89 | 1    | 1,75 | 1   | 26 | 31 | 7  | 6  | 14 | 8  | 10 | 3,9 | 12 |
| 133 | Male   | 17 | 1  | 62 | 6  | 2,33 | 3,33 | 2    | 3   | 23 | 33 | 10 | 9  | 9  | 14 | 12 | 3,7 | 12 |
| 134 | Female | 17 | 1  | 61 | 18 | 2,39 | 4    | 3,25 | 4   | 25 | 35 | 8  | 8  | 14 | 4  | 10 | 2,8 | 12 |
| 135 | Female | 18 | 1  | 46 | 16 | 3    | 2,5  | 2    | 3,8 | 29 | 32 | 9  | 9  | 9  | 10 | 10 | 3   | 9  |
| 136 | Male   | 20 | 3  | 53 | 17 | 2,67 | 1,33 | 2    | 2,4 | 28 | 28 | 6  | 8  | 11 | 11 | 7  | 3   | 9  |
| 137 | Male   | 26 | 3  | 45 | 15 | 2,78 | 2,67 | 3,25 | 2   | 23 | 29 | 9  | 12 | 8  | 10 | 11 | 2,9 | 7  |
| 138 | Male   | 25 | 5+ | 48 | 20 | 2,44 | 4,67 | 2    | 3,4 | 24 | 38 | 11 | 7  | 13 | 11 | 7  | 3   | 6  |
| 139 | Male   | 27 | 5+ | 46 | 26 | 2,39 | 4,17 | 3,5  | 4,2 | 28 | 28 | 12 | 8  | 10 | 12 | 12 | 3,1 | 10 |
| 140 | Female | 18 | 2  | 53 | 21 | 2,78 | 4,17 | 1    | 3   | 26 | 36 | 10 | 8  | 11 | 5  | 8  | 2,6 | 8  |
| 141 | Male   | 22 | 3  | 52 | 12 | 2,22 | 1,83 | 2,75 | 2   | 32 | 33 | 11 | 8  | 9  | 12 | 10 | 2,8 | 12 |
| 142 | Male   | 22 | 3  | 54 | 20 | 2,61 | 3,17 | 2,25 | 3,4 | 31 | 34 | 13 | 7  | 13 | 9  | 6  | 3   | 9  |
| 143 | Male   | 23 | 3  | 56 | 22 | 3,33 | 2,33 | 2,75 | 2,8 | 34 | 34 | 10 | 7  | 11 | 9  | 12 | 3,5 | 9  |
| 144 | Male   | 18 | 1  | 50 | 17 | 3,28 | 4    | 2,75 | 3,8 | 23 | 32 | 11 | 7  | 10 | 12 | 12 | 3,5 | 7  |
| 145 | Male   | 19 | 3  | 44 | 17 | 3,44 | 1    | 2,75 | 2,6 | 19 | 32 | 4  | 8  | 8  | 7  | 8  | 2,6 | 8  |
| 146 | Female | 20 | 1  | 57 | 18 | 2,11 | 3,33 | 1,5  | 1   | 17 | 25 | 12 | 7  | 14 | 8  | 11 | 3,2 | 12 |
| 147 | Male   | 18 | 3  | 53 | 19 | 1,94 | 2,17 | 2    | 1,4 | 30 | 32 | 12 | 6  | 9  | 9  | 10 | 3,3 | 9  |
| 148 | Female | 23 | 4  | 39 | 23 | 3,61 | 1    | 3,5  | 4   | 24 | 31 | 9  | 6  | 11 | 6  | 8  | 2   | 8  |
| 149 | Male   | 19 | 3  | 56 | 23 | 1,72 | 2,5  | 1    | 2,2 | 19 | 21 | 11 | 8  | 14 | 14 | 11 | 4   | 11 |
| 150 | Male   | 24 | 5+ | 50 | 19 | 3    | 4,33 | 3,75 | 3,8 | 28 | 35 | 7  | 9  | 6  | 6  | 11 | 2,5 | 11 |
| 151 | Female | 21 | 4  | 58 | 17 | 2,5  | 2,5  | 2,75 | 4,2 | 24 | 30 | 13 | 9  | 13 | 9  | 10 | 3,2 | 8  |
| 152 | Female | 20 | 2  | 54 | 24 | 2,33 | 3,67 | 3,5  | 2,8 | 27 | 34 | 11 | 8  | 13 | 7  | 11 | 3   | 12 |
| 153 | Female | 20 | 4  | 54 | 11 | 2,5  | 1,17 | 1    | 3   | 17 | 38 | 14 | 9  | 10 | 11 | 8  | 3,2 | 12 |
| 154 | Male   | 16 | 1  | 57 | 8  | 1,89 | 2,83 | 1,5  | 2,6 | 22 | 38 | 9  | 8  | 10 | 12 | 9  | 3   | 8  |
| 155 | Female | 21 | 4  | 49 | 23 | 2,72 | 3,5  | 2    | 3,8 | 25 | 38 | 12 | 8  | 10 | 10 | 8  | 3,2 | 9  |
| 156 | Male   | 21 | 3  | 53 | 20 | 1,83 | 1,17 | 2,75 | 2   | 18 | 28 | 9  | 7  | 10 | 11 | 9  | 2,8 | 9  |
| 157 | Male   | 20 | 3  | 61 | 19 | 1,67 | 3    | 2,75 | 2,2 | 38 | 37 | 14 | 7  | 10 | 9  | 13 | 3,4 | 12 |
| 158 | Female | 19 | 3  | 49 | 16 | 3    | 3,83 | 3,75 | 3,8 | 23 | 31 | 10 | 7  | 11 | 7  | 8  | 2,7 | 12 |
| 159 | Male   | 20 | 3  | 48 | 20 | 2,94 | 3,83 | 3,5  | 3,2 | 33 | 34 | 6  | 8  | 10 | 8  | 10 | 2,3 | 8  |
| 160 | Male   | 22 | 3  | 54 | 10 | 1,78 | 1    | 1    | 1   | 14 | 20 | 12 | 7  | 13 | 14 | 12 | 4   | 12 |
| 161 | Male   | 21 | 5+ | 39 | 23 | 3,11 | 3,17 | 3    | 4   | 27 | 22 | 9  | 10 | 7  | 10 | 9  | 2,8 | 9  |
| 162 | Male   | 20 | 2  | 55 | 14 | 2,5  | 3,17 | 1,5  | 2,6 | 18 | 33 | 10 | 9  | 10 | 12 | 11 | 3,4 | 10 |
| 163 | Female | 20 | 3  | 54 | 12 | 2,17 | 3,83 | 3,25 | 2,2 | 22 | 35 | 12 | 8  | 10 | 12 | 12 | 3,4 | 11 |
| 164 | Female | 21 | 5+ | 46 | 27 | 3,11 | 1    | 3    | 4,2 | 28 | 35 | 8  | 8  | 12 | 6  | 9  | 2,5 | 10 |
| 165 | Female | 19 | 2  | 37 | 26 | 3,56 | 4    | 4    | 4   | 27 | 27 | 7  | 10 | 9  | 5  | 8  | 1,8 | 10 |
| 166 | Female | 18 | 2  | 47 | 22 | 2    | 2,17 | 3    | 3   | 30 | 35 | 14 | 8  | 9  | 6  | 13 | 2,7 | 8  |
| 167 | Male   | 21 | 3  | 56 | 7  | 2,17 | 2    | 2    | 2   | 17 | 24 | 11 | 7  | 11 | 6  | 9  | 3,9 | 9  |
| 168 | Female | 37 | 3  | 56 | 10 | 1,89 | 2,5  | 1,5  | 2,2 | 20 | 36 | 13 | 9  | 14 | 14 | 13 | 4   | 10 |
| 169 | Female | 48 | 2  | 65 | 12 | 2,39 | 1    | 1    | 1   | 18 | 41 | 11 | 11 | 10 | 14 | 13 | 3,6 | 12 |
| 170 | Female | 17 | 1  | 53 | 25 | 2,33 | 2    | 2    | 3   | 25 | 36 | 12 | 8  | 11 | 8  | 11 | 3   | 12 |
| 171 | Female | 20 | 1  | 53 | 20 | 2,44 | 3,5  | 1    | 3   | 23 | 34 | 8  | 9  | 11 | 8  | 11 | 2,8 | 9  |
| 172 | Female | 17 | 1  | 55 | 12 | 2,22 | 4,17 | 3    | 3,2 | 22 | 33 | 7  | 11 | 8  | 12 | 10 | 3,1 | 9  |
| 173 | Female | 23 | 2  | 56 | 10 | 1,56 | 2,17 | 2,25 | 3,2 | 20 | 37 | 13 | 8  | 14 | 9  | 13 | 3,1 | 12 |
| 174 | Female | 23 | 1  | 46 | 17 | 2,67 | 4    | 2,75 | 4   | 24 | 28 | 10 | 8  | 11 | 10 | 9  | 3,4 | 6  |
| 175 | Female | 21 | 1  | 48 | 18 | 2,67 | 2,33 | 3,25 | 2,6 | 25 | 36 | 13 | 8  | 8  | 7  | 9  | 3,2 | 9  |
| 176 | Male   | 31 | 3  | 48 | 21 | 2,5  | 1    | 1,5  | 2,4 | 24 | 38 | 9  | 9  | 14 | 12 | 11 | 3,3 | 10 |
| 177 | Female | 22 | 2  | 51 | 16 | 2,78 | 3    | 2,75 | 3,6 | 25 | 38 | 10 | 8  | 14 | 8  | 13 | 2,8 | 9  |
| 178 | Female | 24 | 3  | 52 | 24 | 3,17 | 2,17 | 3,75 | 4,8 | 26 | 35 | 13 | 9  | 14 | 6  | 12 | 3,3 | 12 |
| 179 | Female | 29 | 3  | 52 | 30 | 3,78 | 1,67 | 1    | 3,8 | 31 | 41 | 13 | 8  | 10 | 6  | 9  | 2,9 | 10 |
| 180 | Female | 28 | 2  | 51 | 16 | 1,78 | 1,5  | 1,5  | 3   | 24 | 31 | 7  | 9  | 14 | 13 | 13 | 3,5 | 11 |
| 181 | Female | 20 | 2  | 59 | 10 | 2,17 | 1,33 | 2    | 2   | 22 | 40 | 12 | 6  | 13 | 7  | 10 | 3,7 | 11 |
| 182 | Female | 17 | 1  | 41 | 17 | 2,67 | 3    | 2,25 | 3,4 | 28 | 30 | 7  | 9  | 10 | 7  | 7  | 2,2 | 11 |
| 183 | Female | 17 | 1  | 42 | 21 | 2,89 | 3,33 | 3,5  | 2,8 | 23 | 31 | 3  | 8  | 9  | 5  | 9  | 2,1 | 7  |
| 184 | Female | 27 | 2  | 41 | 28 | 2,83 | 4    | 2,5  | 5   | 25 | 33 | 12 | 7  | 9  | 4  | 12 | 3   | 12 |
| 185 | Male   | 28 | 2  | 46 | 15 | 1,72 | 3,67 | 1    | 2,6 | 25 | 40 | 5  | 9  | 10 | 14 | 7  | 3,1 | 8  |
| 186 | Male   | 47 | 1  | 54 | 13 | 1,44 | 2    | 1    | 1   | 18 | 36 | 14 | 9  | 12 | 13 | 12 | 3,5 | 10 |
| 187 | Female | 22 | 1  | 35 | 28 | 2,44 | 3,33 | 1,25 | 2,8 | 25 | 30 | 13 | 9  | 9  | 7  | 9  | 2,6 | 8  |
| 188 | Female | 22 | 3  | 43 | 25 | 2,89 | 4    | 1,25 | 2,6 | 23 | 32 | 8  | 8  | 13 | 10 | 8  | 2,7 | 9  |
| 189 | Female | 38 | 3  | 33 | 27 | 2,72 | 1,83 | 2,5  | 4,6 | 24 | 38 | 14 | 9  | 10 | 8  | 14 | 3,8 | 10 |
| 190 | Female | 26 | 2  | 52 | 26 | 2,22 | 2,83 | 1,75 | 3,6 | 20 | 41 | 9  | 9  | 13 | 11 | 14 | 3,2 | 9  |

|     |        |    |   |    |    |      |      |      |     |    |    |    |    |    |    |    |     |    |
|-----|--------|----|---|----|----|------|------|------|-----|----|----|----|----|----|----|----|-----|----|
| 191 | Female | 18 | 1 | 57 | 16 | 2,11 | 2    | 1,75 | 1,8 | 26 | 37 | 12 | 9  | 10 | 10 | 8  | 3,3 | 12 |
| 192 | Female | 28 | 4 | 49 | 24 | 2,83 | 2,83 | 1,5  | 5   | 25 | 36 | 12 | 8  | 9  | 13 | 9  | 3,4 | 12 |
| 193 | Male   | 24 | 4 | 57 | 16 | 1,78 | 2,5  | 1    | 4   | 21 | 35 | 12 | 9  | 8  | 10 | 12 | 2,8 | 12 |
| 194 | Female | 48 | 2 | 51 | 27 | 2,67 | 3    | 1,75 | 4,6 | 25 | 37 | 12 | 7  | 8  | 7  | 14 | 2,5 | 6  |
| 195 | Female | 19 | 1 | 57 | 17 | 2,28 | 3,5  | 2    | 4   | 19 | 24 | 7  | 12 | 12 | 12 | 12 | 3   | 12 |
| 196 | Female | 19 | 1 | 64 | 7  | 2,06 | 3    | 1,5  | 3,4 | 20 | 38 | 13 | 8  | 11 | 11 | 10 | 3,1 | 9  |
| 197 | Female | 46 | 1 | 46 | 24 | 2,56 | 1    | 2,25 | 4   | 21 | 37 | 14 | 8  | 14 | 7  | 10 | 3   | 7  |
| 198 | Female | 35 | 1 | 56 | 16 | 2,28 | 2,67 | 3    | 3,4 | 23 | 33 | 14 | 9  | 14 | 10 | 14 | 3,2 | 11 |
| 199 | Female | 47 | 2 | 55 | 17 | 1,94 | 1    | 2,75 | 4,2 | 17 | 25 | 12 | 9  | 10 | 13 | 7  | 3,4 | 9  |
| 200 | Female | 23 | 2 | 42 | 26 | 2,94 | 4,83 | 3,75 | 4,8 | 26 | 39 | 3  | 6  | 12 | 6  | 10 | 2,4 | 8  |
| 201 | Female | 26 | 3 | 41 | 26 | 2,89 | 4,17 | 3    | 4   | 29 | 38 | 8  | 9  | 8  | 7  | 10 | 2,9 | 9  |
| 202 | Female | 20 | 1 | 50 | 18 | 3    | 4,5  | 2,5  | 3,6 | 27 | 36 | 14 | 10 | 14 | 10 | 13 | 2,6 | 8  |
| 203 | Female | 20 | 2 | 55 | 20 | 3    | 5    | 2,75 | 4   | 29 | 39 | 14 | 9  | 13 | 10 | 11 | 3,1 | 10 |
| 204 | Female | 20 | 2 | 50 | 16 | 2,67 | 2,67 | 2    | 4   | 20 | 34 | 4  | 6  | 14 | 14 | 13 | 3   | 8  |
| 205 | Male   | 25 | 3 | 56 | 22 | 3    | 4    | 4    | 4   | 36 | 36 | 8  | 8  | 8  | 8  | 8  | 2,5 | 6  |
| 206 | Female | 36 | 1 | 51 | 20 | 2,44 | 1,83 | 1,5  | 2,4 | 23 | 42 | 5  | 7  | 14 | 9  | 11 | 1,6 | 7  |
| 207 | Female | 31 | 2 | 57 | 21 | 2,5  | 3,17 | 1    | 2,8 | 23 | 36 | 8  | 9  | 11 | 10 | 10 | 2,9 | 9  |
| 208 | Female | 37 | 2 | 47 | 31 | 2,83 | 1    | 2,25 | 5   | 23 | 30 | 12 | 9  | 8  | 8  | 10 | 2,7 | 10 |
| 209 | Female | 18 | 1 | 58 | 17 | 2,61 | 3,67 | 1,25 | 5   | 31 | 42 | 13 | 9  | 14 | 10 | 8  | 3,8 | 12 |
| 210 | Female | 24 | 4 | 39 | 22 | 1,94 | 3,67 | 2,5  | 4,4 | 32 | 41 | 9  | 10 | 11 | 10 | 13 | 3   | 9  |
| 211 | Female | 19 | 3 | 41 | 27 | 2,83 | 3    | 1,5  | 3,4 | 27 | 41 | 13 | 9  | 13 | 10 | 12 | 3,1 | 7  |
| 212 | Female | 17 | 1 | 64 | 7  | 1,06 | 1    | 1    | 1   | 15 | 25 | 7  | 11 | 11 | 14 | 12 | 3,7 | 12 |
| 213 | Male   | 22 | 2 | 34 | 21 | 2    | 4,17 | 1,5  | 3,8 | 24 | 26 | 12 | 8  | 12 | 8  | 9  | 2,5 | 7  |
| 214 | Female | 18 | 2 | 51 | 14 | 2,39 | 2,5  | 2    | 3,8 | 18 | 35 | 6  | 10 | 13 | 13 | 11 | 2,9 | 9  |
| 215 | Female | 20 | 4 | 35 | 28 | 2,56 | 4,17 | 1,5  | 4,2 | 25 | 23 | 4  | 10 | 12 | 5  | 9  | 2,7 | 8  |
| 216 | Female | 23 | 3 | 43 | 26 | 2    | 5    | 1,5  | 2,4 | 30 | 36 | 11 | 9  | 11 | 7  | 9  | 2,7 | 9  |
| 217 | Female | 20 | 4 | 55 | 11 | 2,28 | 2,83 | 1,75 | 2,6 | 18 | 28 | 7  | 9  | 13 | 12 | 12 | 3,3 | 9  |
| 218 | Female | 17 | 1 | 50 | 15 | 2,28 | 2,5  | 1,25 | 2,2 | 25 | 38 | 8  | 10 | 11 | 8  | 11 | 3,2 | 9  |
| 219 | Female | 18 | 2 | 34 | 23 | 3,06 | 3,17 | 3,25 | 3,4 | 25 | 25 | 14 | 9  | 12 | 13 | 12 | 2,6 | 10 |
| 220 | Female | 19 | 2 | 38 | 24 | 2,56 | 3,17 | 2    | 5   | 23 | 24 | 8  | 7  | 9  | 5  | 11 | 2,6 | 9  |
| 221 | Female | 18 | 2 | 35 | 26 | 3    | 3,17 | 2    | 4,2 | 23 | 25 | 7  | 11 | 9  | 11 | 9  | 2,3 | 8  |
| 222 | Female | 19 | 2 | 30 | 30 | 3,72 | 3,67 | 2    | 4   | 26 | 24 | 5  | 8  | 7  | 2  | 6  | 1,8 | 7  |
| 223 | Female | 21 | 4 | 58 | 7  | 1,94 | 2    | 2    | 2   | 19 | 34 | 10 | 12 | 11 | 12 | 12 | 2,9 | 9  |
| 224 | Male   | 19 | 2 | 53 | 12 | 3,22 | 3,67 | 3,75 | 3,4 | 29 | 38 | 14 | 7  | 9  | 8  | 14 | 2,6 | 8  |
| 225 | Female | 20 | 2 | 46 | 17 | 2,72 | 2,33 | 2    | 2,2 | 24 | 33 | 10 | 12 | 12 | 9  | 10 | 2,8 | 9  |
| 226 | Female | 17 | 1 | 49 | 20 | 2,56 | 2,67 | 1,75 | 2,4 | 23 | 32 | 10 | 11 | 10 | 7  | 11 | 3,1 | 8  |
| 227 | Female | 18 | 1 | 51 | 15 | 1,5  | 2,17 | 2    | 1   | 27 | 38 | 9  | 9  | 14 | 10 | 9  | 2,4 | 8  |
| 228 | Male   | 44 | 1 | 56 | 7  | 1,94 | 1    | 1    | 1   | 22 | 33 | 9  | 8  | 13 | 12 | 9  | 3,5 | 9  |
| 229 | Female | 52 | 2 | 49 | 20 | 2,78 | 1    | 1    | 3,8 | 23 | 34 | 8  | 6  | 11 | 12 | 8  | 2,8 | 7  |
| 230 | Male   | 46 | 4 | 44 | 19 | 2,78 | 1    | 2,75 | 4,6 | 21 | 32 | 9  | 6  | 10 | 9  | 8  | 3,1 | 7  |
| 231 | Male   | 29 | 2 | 47 | 22 | 2,22 | 1    | 1    | 4   | 25 | 36 | 9  | 7  | 14 | 11 | 10 | 3   | 8  |
| 232 | Male   | 30 | 1 | 57 | 8  | 1,94 | 1,5  | 1,5  | 1,2 | 17 | 27 | 3  | 5  | 11 | 12 | 7  | 2,9 | 11 |
| 233 | Male   | 25 | 2 | 56 | 26 | 3    | 3,17 | 2,5  | 4   | 28 | 34 | 11 | 7  | 9  | 8  | 9  | 3,1 | 8  |
| 234 | Male   | 44 | 4 | 55 | 12 | 1,94 | 1    | 1,5  | 1,2 | 14 | 19 | 6  | 7  | 14 | 13 | 10 | 4   | 7  |
| 235 | Female | 43 | 1 | 62 | 14 | 2,56 | 1,83 | 1,75 | 4   | 23 | 44 | 11 | 7  | 13 | 9  | 14 | 3,6 | 10 |
| 236 | Male   | 35 | 1 | 54 | 16 | 2,28 | 2,5  | 1,75 | 2,4 | 20 | 37 | 12 | 8  | 9  | 13 | 10 | 3,2 | 9  |
| 237 | Female | 23 | 3 | 40 | 27 | 3,33 | 2,17 | 2,5  | 3,8 | 26 | 21 | 11 | 9  | 6  | 9  | 8  | 2,3 | 12 |
| 238 | Female | 18 | 2 | 30 | 34 | 3,44 | 1,83 | 4    | 4,8 | 30 | 31 | 5  | 6  | 12 | 4  | 12 | 2,4 | 8  |
| 239 | Female | 19 | 3 | 42 | 25 | 3,11 | 3,33 | 3    | 4,2 | 26 | 36 | 5  | 8  | 11 | 6  | 9  | 2,2 | 7  |
| 240 | Male   | 23 | 1 | 63 | 9  | 2,06 | 2,67 | 1,75 | 3,2 | 18 | 33 | 13 | 9  | 13 | 14 | 13 | 3,6 | 12 |
| 241 | Male   | 26 | 4 | 42 | 27 | 2,89 | 3    | 2    | 4,2 | 27 | 35 | 7  | 7  | 8  | 11 | 12 | 3   | 9  |
| 242 | Female | 31 | 4 | 49 | 22 | 1,89 | 3,83 | 1    | 3   | 27 | 43 | 6  | 8  | 14 | 9  | 9  | 2,6 | 9  |
| 243 | Female | 20 | 4 | 51 | 13 | 2,5  | 2,17 | 2    | 3,4 | 20 | 37 | 13 | 8  | 11 | 10 | 9  | 3,3 | 11 |
| 244 | Female | 19 | 4 | 57 | 16 | 2,56 | 3,67 | 2    | 4   | 20 | 34 | 9  | 7  | 12 | 11 | 10 | 3,5 | 9  |
| 245 | Female | 28 | 4 | 46 | 25 | 3,22 | 3,5  | 3    | 3,2 | 23 | 32 | 10 | 9  | 8  | 8  | 11 | 2,9 | 12 |
| 246 | Female | 20 | 4 | 46 | 30 | 3,28 | 3,33 | 2,75 | 3,6 | 23 | 27 | 4  | 8  | 13 | 8  | 6  | 2,6 | 8  |
| 247 | Female | 17 | 2 | 42 | 24 | 2,33 | 2,83 | 1,75 | 2,6 | 26 | 32 | 13 | 9  | 10 | 8  | 11 | 3,2 | 10 |
| 248 | Female | 21 | 4 | 46 | 26 | 3    | 2,67 | 2,5  | 2,8 | 23 | 34 | 2  | 9  | 13 | 11 | 8  | 2,7 | 6  |
| 249 | Female | 21 | 4 | 41 | 22 | 3,06 | 2,17 | 3    | 3,6 | 22 | 27 | 6  | 9  | 9  | 6  | 9  | 2,3 | 8  |
| 250 | Male   | 25 | 1 | 55 | 12 | 2,17 | 3,17 | 3,75 | 3,4 | 19 | 41 | 13 | 11 | 12 | 13 | 11 | 3,6 | 9  |
| 251 | Male   | 21 | 1 | 43 | 28 | 2,89 | 1,33 | 1    | 3,6 | 21 | 34 | 13 | 6  | 10 | 5  | 10 | 2,9 | 9  |
| 252 | Female | 21 | 1 | 48 | 16 | 1,72 | 2,67 | 2    | 2   | 17 | 28 | 5  | 10 | 9  | 13 | 11 | 3,5 | 10 |
| 253 | Female | 39 | 2 | 53 | 19 | 2,5  | 2,33 | 1,25 | 3,4 | 17 | 36 | 3  | 10 | 14 | 11 | 11 | 3   | 9  |
| 254 | Male   | 17 | 1 | 55 | 18 | 2,56 | 1,67 | 1    | 2,4 | 24 | 40 | 8  | 7  | 13 | 13 | 8  | 2,9 | 7  |

|     |         |    |   |    |    |      |      |      |     |    |    |    |    |    |    |    |     |    |
|-----|---------|----|---|----|----|------|------|------|-----|----|----|----|----|----|----|----|-----|----|
| 255 | Female  | 21 | 3 | 36 | 29 | 1,83 | 3,17 | 1,25 | 4   | 26 | 34 | 5  | 14 | 14 | 6  | 11 | 3,1 | 9  |
| 256 | Male    | 19 | 1 | 47 | 21 | 2,72 | 3,33 | 2,25 | 3,4 | 26 | 28 | 11 | 7  | 11 | 10 | 8  | 3,1 | 6  |
| 257 | Female  | 20 | 1 | 55 | 15 | 2,67 | 3,5  | 3    | 3,2 | 23 | 40 | 12 | 7  | 13 | 11 | 13 | 2,5 | 8  |
| 258 | Male    | 21 | 1 | 43 | 25 | 3,06 | 2,83 | 2,75 | 2,2 | 31 | 29 | 6  | 5  | 6  | 12 | 10 | 2   | 9  |
| 259 | Male    | 48 | 1 | 63 | 11 | 2    | 4,17 | 1,75 | 4,4 | 16 | 32 | 3  | 8  | 14 | 14 | 13 | 4   | 12 |
| 260 | Female  | 16 | 1 | 52 | 20 | 2,78 | 2,17 | 2,25 | 4   | 31 | 34 | 9  | 7  | 10 | 3  | 11 | 2,4 | 9  |
| 261 | Male    | 26 | 2 | 70 | 9  | 1,56 | 1    | 1    | 1,2 | 17 | 23 | 2  | 8  | 8  | 14 | 14 | 3,9 | 11 |
| 262 | Male    | 17 | 1 | 37 | 19 | 3,61 | 2,5  | 3,25 | 4,2 | 33 | 27 | 7  | 8  | 5  | 8  | 3  | 1,6 | 6  |
| 263 | Female  | 55 | 4 | 59 | 18 | 2,22 | 3    | 3    | 4   | 19 | 33 | 8  | 7  | 13 | 12 | 9  | 3,5 | 12 |
| 264 | Female  | 50 | 2 | 56 | 15 | 1,94 | 1    | 1    | 1   | 16 | 26 | 11 | 8  | 14 | 14 | 12 | 3,9 | 12 |
| 265 | Female  | 24 | 1 | 56 | 19 | 3    | 3,67 | 3,25 | 3,4 | 20 | 20 | 9  | 8  | 8  | 8  | 8  | 2,8 | 9  |
| 266 | Female  | 17 | 1 | 52 | 15 | 2,78 | 3    | 1,5  | 1,2 | 19 | 37 | 7  | 6  | 9  | 6  | 11 | 3,2 | 9  |
| 267 | Female  | 17 | 1 | 50 | 25 | 3,33 | 2,67 | 1,5  | 3,6 | 22 | 31 | 6  | 8  | 9  | 10 | 11 | 2,7 | 7  |
| 268 | Female  | 18 | 1 | 51 | 19 | 2,89 | 3,67 | 2,75 | 3,6 | 25 | 35 | 13 | 8  | 12 | 7  | 8  | 2,7 | 12 |
| 269 | Female  | 23 | 4 | 42 | 18 | 1,94 | 2,83 | 1,75 | 3   | 23 | 28 | 6  | 5  | 14 | 5  | 8  | 2,8 | 9  |
| 270 | Female  | 22 | 3 | 54 | 13 | 2,39 | 2,17 | 1,75 | 2,8 | 21 | 45 | 9  | 8  | 14 | 8  | 13 | 3   | 12 |
| 271 | Female  | 22 | 2 | 48 | 24 | 3,28 | 5    | 5    | 4,2 | 27 | 37 | 7  | 8  | 8  | 6  | 9  | 3   | 8  |
| 272 | Female  | 20 | 3 | 54 | 14 | 1,94 | 3,17 | 2    | 2   | 20 | 37 | 13 | 8  | 14 | 13 | 14 | 3   | 12 |
| 273 | Female  | 19 | 2 | 51 | 16 | 2,89 | 3    | 1,25 | 4   | 19 | 31 | 7  | 9  | 14 | 8  | 7  | 2,9 | 12 |
| 274 | Female  | 19 | 1 | 53 | 17 | 2,39 | 4,17 | 1,5  | 3,4 | 23 | 37 | 8  | 9  | 14 | 9  | 12 | 3,3 | 8  |
| 275 | Male    | 21 | 1 | 49 | 11 | 1,89 | 2,83 | 1,75 | 1   | 23 | 34 | 4  | 8  | 10 | 13 | 9  | 3,3 | 9  |
| 276 | Female  | 17 | 1 | 52 | 27 | 3,28 | 3,17 | 3,5  | 4,2 | 24 | 35 | 11 | 8  | 12 | 5  | 11 | 2,6 | 6  |
| 277 | Female  | 23 | 4 | 50 | 17 | 2,33 | 3,33 | 2,5  | 2,4 | 25 | 35 | 13 | 7  | 11 | 7  | 7  | 2,7 | 8  |
| 278 | Female  | 25 | 4 | 45 | 32 | 2,72 | 4    | 3    | 5   | 29 | 43 | 9  | 9  | 9  | 7  | 9  | 2,8 | 12 |
| 279 | Female  | 21 | 2 | 54 | 14 | 2,39 | 1,33 | 1,75 | 1,8 | 21 | 29 | 8  | 11 | 13 | 12 | 12 | 3,2 | 11 |
| 280 | Female  | 22 | 2 | 46 | 27 | 3,94 | 4,5  | 5    | 4,2 | 26 | 36 | 7  | 8  | 8  | 7  | 9  | 2,8 | 6  |
| 281 | Female  | 21 | 4 | 43 | 22 | 2,61 | 2    | 1,75 | 3,4 | 26 | 25 | 7  | 12 | 12 | 10 | 8  | 2,1 | 6  |
| 282 | Female  | 21 | 3 | 50 | 26 | 3,39 | 4,67 | 1,75 | 5   | 26 | 37 | 13 | 13 | 9  | 9  | 14 | 2,6 | 8  |
| 283 | Female  | 21 | 3 | 49 | 21 | 1,83 | 3    | 3,75 | 2,8 | 25 | 34 | 6  | 7  | 14 | 8  | 12 | 2,5 | 8  |
| 284 | Female  | 19 | 2 | 47 | 26 | 3    | 4,17 | 3    | 4   | 22 | 34 | 5  | 6  | 12 | 8  | 12 | 3,1 | 6  |
| 285 | Female  | 27 | 3 | 54 | 18 | 2,06 | 4    | 2    | 4   | 30 | 36 | 14 | 7  | 9  | 11 | 13 | 3   | 12 |
| 286 | Female  | 18 | 1 | 48 | 18 | 2,56 | 2,33 | 1,75 | 2,8 | 22 | 39 | 10 | 9  | 14 | 7  | 9  | 3,2 | 12 |
| 287 | Female  | 19 | 2 | 57 | 14 | 2,61 | 2,17 | 1,75 | 3   | 22 | 32 | 8  | 8  | 13 | 10 | 10 | 3,1 | 12 |
| 288 | Female  | 20 | 3 | 45 | 21 | 2,78 | 1,83 | 2,5  | 1,6 | 29 | 40 | 6  | 10 | 13 | 5  | 8  | 2   | 12 |
| 289 | Female  | 21 | 3 | 53 | 14 | 2,22 | 4,17 | 1,5  | 4   | 21 | 45 | 12 | 8  | 14 | 10 | 13 | 3,2 | 9  |
| 290 | Female  | 21 | 1 | 44 | 26 | 3,17 | 2,83 | 3,5  | 4   | 23 | 33 | 3  | 6  | 9  | 6  | 6  | 2,3 | 9  |
| 291 | Female  | 21 | 2 | 51 | 26 | 2,5  | 3,83 | 1,75 | 3,6 | 30 | 24 | 14 | 8  | 9  | 5  | 8  | 3   | 7  |
| 292 | Female  | 21 | 3 | 51 | 23 | 2,06 | 2,83 | 2,75 | 4   | 22 | 36 | 14 | 7  | 13 | 8  | 13 | 3,6 | 12 |
| 293 | Female  | 21 | 2 | 43 | 22 | 3,39 | 2,83 | 2,75 | 3   | 25 | 27 | 8  | 8  | 10 | 11 | 12 | 2,3 | 7  |
| 294 | Female  | 18 | 1 | 38 | 22 | 2,89 | 3    | 2,75 | 3,6 | 24 | 31 | 8  | 8  | 12 | 6  | 8  | 2,3 | 8  |
| 295 | Female  | 22 | 4 | 47 | 27 | 3,5  | 3,83 | 1    | 4   | 28 | 33 | 3  | 7  | 12 | 8  | 12 | 2,7 | 8  |
| 296 | Female  | 19 | 2 | 33 | 34 | 3,33 | 3,67 | 1,75 | 4,4 | 27 | 27 | 2  | 8  | 11 | 3  | 14 | 2,4 | 6  |
| 297 | Female  | 20 | 2 | 57 | 28 | 2,72 | 4,17 | 2    | 5   | 21 | 42 | 10 | 10 | 14 | 11 | 13 | 4   | 12 |
| 298 | Female  | 18 | 2 | 55 | 14 | 1,56 | 3    | 1,25 | 3,6 | 32 | 44 | 6  | 8  | 10 | 11 | 13 | 3,2 | 8  |
| 299 | Female  | 18 | 2 | 39 | 29 | 3,28 | 1,17 | 1    | 3,6 | 23 | 33 | 8  | 11 | 10 | 8  | 11 | 2,9 | 10 |
| 300 | Female  | 17 | 1 | 51 | 19 | 3,22 | 3,17 | 2,75 | 3,6 | 25 | 38 | 12 | 9  | 13 | 5  | 9  | 2,6 | 12 |
| 301 | Female  | 18 | 2 | 39 | 20 | 2,5  | 2    | 2    | 2,2 | 20 | 33 | 4  | 8  | 13 | 7  | 9  | 2,4 | 9  |
| 302 | Female  | 18 | 2 | 41 | 25 | 2,83 | 4    | 1,5  | 4   | 21 | 22 | 9  | 10 | 8  | 8  | 10 | 3   | 6  |
| 303 | Female  | 20 | 2 | 46 | 22 | 3,06 | 3    | 2,5  | 4   | 26 | 32 | 3  | 11 | 9  | 5  | 8  | 2,4 | 9  |
| 304 | Female  | 17 | 1 | 57 | 20 | 2,17 | 3,33 | 1    | 2,6 | 16 | 27 | 10 | 9  | 11 | 13 | 13 | 3,8 | 11 |
| 305 | Female  | 20 | 4 | 56 | 22 | 3,11 | 2    | 2,5  | 3,4 | 27 | 30 | 14 | 11 | 7  | 10 | 13 | 3,8 | 12 |
| 306 | Female  | 20 | 4 | 52 | 15 | 1,44 | 3,83 | 2,25 | 2,8 | 27 | 33 | 12 | 6  | 12 | 8  | 9  | 3,2 | 11 |
| 307 | Female  | 19 | 2 | 40 | 24 | 2,72 | 4    | 2,75 | 4   | 24 | 30 | 8  | 9  | 14 | 13 | 9  | 3   | 10 |
| 308 | Female  | 21 | 2 | 47 | 23 | 3,22 | 4,5  | 3,25 | 5   | 31 | 40 | 7  | 7  | 14 | 6  | 10 | 2,4 | 11 |
| 309 | Female  | 19 | 3 | 51 | 19 | 2,56 | 1    | 1,25 | 3   | 21 | 34 | 8  | 11 | 10 | 6  | 6  | 2,6 | 12 |
| 310 | Female  | 23 | 4 | 46 | 28 | 3    | 3,33 | 3    | 3,2 | 28 | 27 | 5  | 11 | 9  | 7  | 10 | 2,5 | 9  |
| 311 | Female  | 20 | 4 | 47 | 26 | 2,89 | 3,5  | 3,75 | 4,2 | 20 | 32 | 7  | 7  | 14 | 12 | 7  | 2,4 | 10 |
| 312 | Neutral | 18 | 2 | 52 | 14 | 2,39 | 2,33 | 1,75 | 2,6 | 23 | 35 | 6  | 9  | 13 | 9  | 10 | 3,2 | 8  |
| 313 | Female  | 21 | 3 | 54 | 15 | 1,89 | 3,67 | 1    | 3,4 | 22 | 41 | 12 | 12 | 11 | 13 | 10 | 3,6 | 11 |
| 314 | Female  | 19 | 2 | 49 | 24 | 3,06 | 2,67 | 1    | 2,2 | 24 | 35 | 7  | 9  | 12 | 6  | 11 | 2,5 | 12 |
| 315 | Female  | 20 | 4 | 50 | 19 | 2,78 | 2,5  | 1,5  | 4,4 | 28 | 35 | 8  | 9  | 13 | 9  | 8  | 2,6 | 11 |
| 316 | Female  | 20 | 2 | 37 | 26 | 2,61 | 1    | 1,5  | 3,2 | 29 | 36 | 4  | 11 | 12 | 7  | 9  | 2,7 | 10 |
| 317 | Female  | 20 | 2 | 47 | 22 | 2,5  | 2,5  | 1    | 4   | 24 | 34 | 8  | 8  | 12 | 8  | 12 | 3,6 | 9  |
| 318 | Female  | 19 | 1 | 28 | 30 | 3,78 | 3,17 | 2,75 | 5   | 30 | 22 | 2  | 9  | 9  | 3  | 7  | 1,2 | 6  |

|     |         |    |    |    |    |      |      |      |     |    |    |    |    |    |    |    |     |    |
|-----|---------|----|----|----|----|------|------|------|-----|----|----|----|----|----|----|----|-----|----|
| 319 | Male    | 18 | 2  | 51 | 29 | 2,56 | 4,83 | 2,75 | 5   | 22 | 37 | 12 | 8  | 14 | 10 | 9  | 3,8 | 10 |
| 320 | Male    | 27 | 4  | 33 | 33 | 3,5  | 5    | 2,75 | 4,6 | 23 | 25 | 8  | 5  | 7  | 5  | 11 | 3   | 8  |
| 321 | Male    | 24 | 4  | 43 | 23 | 2,78 | 1,83 | 1    | 4,2 | 18 | 28 | 14 | 9  | 14 | 14 | 7  | 3,4 | 8  |
| 322 | Male    | 24 | 5+ | 51 | 30 | 3,33 | 1,5  | 1,25 | 4,2 | 25 | 36 | 5  | 7  | 6  | 8  | 8  | 3,1 | 9  |
| 323 | Male    | 20 | 2  | 57 | 26 | 2,83 | 4,33 | 1    | 4,8 | 18 | 38 | 7  | 8  | 10 | 11 | 10 | 3,6 | 10 |
| 324 | Male    | 22 | 5+ | 38 | 24 | 2,5  | 1,17 | 1    | 2,4 | 28 | 21 | 12 | 7  | 9  | 12 | 13 | 3   | 11 |
| 325 | Male    | 22 | 4  | 54 | 7  | 1,61 | 1,33 | 2,25 | 1   | 20 | 27 | 9  | 13 | 14 | 14 | 12 | 3,3 | 5  |
| 326 | Male    | 22 | 4  | 42 | 21 | 1,83 | 3,17 | 1,75 | 3,4 | 18 | 36 | 13 | 7  | 10 | 13 | 7  | 3,2 | 11 |
| 327 | Male    | 22 | 2  | 55 | 22 | 2,72 | 3,5  | 1,5  | 3,6 | 26 | 37 | 9  | 8  | 6  | 9  | 8  | 3,1 | 11 |
| 328 | Male    | 19 | 1  | 50 | 13 | 2,44 | 2,17 | 2,5  | 2,8 | 18 | 23 | 7  | 7  | 12 | 13 | 9  | 3,2 | 11 |
| 329 | Male    | 26 | 5+ | 58 | 20 | 2,17 | 3,33 | 2,75 | 5   | 27 | 35 | 11 | 5  | 9  | 11 | 10 | 3,1 | 10 |
| 330 | Female  | 21 | 2  | 52 | 21 | 2,22 | 2,17 | 1    | 4,4 | 28 | 35 | 14 | 6  | 11 | 5  | 10 | 3,2 | 7  |
| 331 | Female  | 26 | 4  | 45 | 22 | 2,72 | 3,33 | 1,5  | 4   | 23 | 26 | 3  | 8  | 9  | 8  | 10 | 2,5 | 8  |
| 332 | Male    | 26 | 2  | 40 | 18 | 2,5  | 3,67 | 2,5  | 4   | 25 | 32 | 7  | 5  | 12 | 6  | 8  | 2,3 | 11 |
| 333 | Male    | 26 | 2  | 52 | 18 | 2,78 | 4    | 1,5  | 3,4 | 23 | 26 | 9  | 7  | 10 | 11 | 12 | 2,6 | 10 |
| 334 | Male    | 20 | 1  | 35 | 24 | 4,11 | 4,17 | 4,25 | 4,4 | 21 | 28 | 8  | 6  | 10 | 6  | 7  | 2,7 | 7  |
| 335 | Male    | 19 | 1  | 48 | 21 | 2,56 | 1,67 | 1,75 | 2,4 | 19 | 30 | 12 | 8  | 10 | 11 | 13 | 2,9 | 12 |
| 336 | Male    | 19 | 1  | 54 | 8  | 1,56 | 1,33 | 1    | 1   | 22 | 41 | 4  | 9  | 13 | 11 | 14 | 2,7 | 11 |
| 337 | Male    | 18 | 1  | 53 | 10 | 1,28 | 3    | 1,5  | 3,6 | 24 | 34 | 7  | 8  | 12 | 8  | 10 | 3,1 | 8  |
| 338 | Male    | 23 | 5+ | 47 | 21 | 2,89 | 3    | 1    | 4   | 28 | 31 | 11 | 5  | 10 | 12 | 10 | 3,6 | 12 |
| 339 | Male    | 18 | 2  | 67 | 7  | 1,5  | 1    | 1    | 1   | 20 | 37 | 5  | 9  | 9  | 14 | 9  | 3,5 | 12 |
| 340 | Male    | 22 | 2  | 52 | 18 | 2,61 | 3,17 | 2    | 1,6 | 22 | 37 | 4  | 8  | 9  | 14 | 8  | 2,7 | 9  |
| 341 | Male    | 20 | 2  | 53 | 16 | 2,44 | 3    | 2,5  | 2   | 20 | 28 | 10 | 8  | 9  | 10 | 8  | 2,7 | 12 |
| 342 | Female  | 31 | 2  | 52 | 28 | 3,94 | 4    | 4    | 4,8 | 27 | 30 | 8  | 13 | 9  | 8  | 8  | 2,5 | 6  |
| 343 | Male    | 18 | 2  | 41 | 22 | 3,78 | 1,5  | 3,5  | 3   | 24 | 20 | 2  | 11 | 7  | 7  | 8  | 2,3 | 9  |
| 344 | Male    | 21 | 2  | 54 | 14 | 2,11 | 1,83 | 1,75 | 1   | 20 | 34 | 5  | 6  | 11 | 14 | 6  | 3,6 | 11 |
| 345 | Neutral | 23 | 4  | 39 | 22 | 3,06 | 1,33 | 1,25 | 3,6 | 18 | 25 | 5  | 5  | 11 | 12 | 8  | 2,6 | 9  |
| 346 | Male    | 25 | 2  | 58 | 13 | 2,56 | 2,33 | 1    | 2   | 22 | 33 | 14 | 5  | 8  | 10 | 11 | 3,4 | 11 |
| 347 | Female  | 20 | 1  | 54 | 20 | 2,83 | 3,17 | 2    | 3   | 21 | 31 | 8  | 8  | 8  | 11 | 11 | 3   | 12 |
| 348 | Male    | 20 | 1  | 60 | 14 | 2    | 2    | 1    | 2,6 | 27 | 40 | 9  | 8  | 12 | 11 | 12 | 3,3 | 12 |
| 349 | Male    | 21 | 2  | 70 | 25 | 1,94 | 3,17 | 2,75 | 3   | 19 | 38 | 11 | 8  | 14 | 13 | 14 | 3,5 | 10 |
| 350 | Male    | 23 | 4  | 62 | 5  | 2,56 | 1,67 | 1    | 2,6 | 15 | 20 | 9  | 8  | 14 | 14 | 12 | 4   | 12 |
| 351 | Male    | 18 | 1  | 51 | 15 | 3,17 | 3    | 2,75 | 2,8 | 21 | 36 | 10 | 8  | 7  | 8  | 8  | 2,6 | 12 |
| 352 | Male    | 20 | 1  | 56 | 12 | 2,28 | 1    | 1    | 1,2 | 18 | 21 | 8  | 8  | 11 | 10 | 9  | 3,1 | 9  |
| 353 | Male    | 21 | 2  | 51 | 16 | 2,5  | 3    | 2    | 2,6 | 20 | 33 | 4  | 7  | 14 | 10 | 11 | 3,1 | 7  |
| 354 | Male    | 18 | 1  | 69 | 5  | 2    | 2,67 | 2    | 2   | 12 | 24 | 14 | 9  | 10 | 12 | 12 | 4   | 12 |
| 355 | Male    | 19 | 1  | 59 | 21 | 2,89 | 1,33 | 2,75 | 4   | 23 | 28 | 4  | 6  | 9  | 14 | 10 | 3,9 | 10 |
| 356 | Female  | 17 | 1  | 55 | 16 | 2,78 | 2    | 1,25 | 3,4 | 18 | 33 | 12 | 7  | 10 | 12 | 12 | 3,3 | 12 |
| 357 | Male    | 18 | 1  | 66 | 6  | 1,61 | 2,5  | 1,25 | 1,6 | 16 | 29 | 10 | 9  | 11 | 13 | 14 | 4   | 11 |
| 358 | Male    | 18 | 2  | 46 | 24 | 2,72 | 2,5  | 1,75 | 3,6 | 23 | 41 | 10 | 7  | 9  | 11 | 12 | 3,3 | 7  |
| 359 | Male    | 20 | 2  | 32 | 26 | 1,44 | 1,5  | 3    | 2,4 | 30 | 34 | 12 | 6  | 14 | 4  | 10 | 2,5 | 6  |
| 360 | Male    | 19 | 1  | 55 | 22 | 4    | 3,67 | 3    | 4,6 | 29 | 33 | 12 | 9  | 8  | 9  | 11 | 2,9 | 8  |
| 361 | Male    | 20 | 1  | 55 | 17 | 2,67 | 3,5  | 3,75 | 2,8 | 18 | 29 | 3  | 7  | 8  | 14 | 9  | 3,5 | 11 |
| 362 | Male    | 19 | 1  | 52 | 20 | 2,67 | 3,5  | 3,5  | 3,6 | 36 | 32 | 7  | 7  | 8  | 5  | 8  | 3,3 | 10 |
| 363 | Male    | 21 | 1  | 56 | 15 | 2,39 | 1,67 | 1,5  | 1,4 | 22 | 38 | 5  | 8  | 11 | 12 | 9  | 3,1 | 9  |
| 364 | Male    | 22 | 1  | 54 | 22 | 3,28 | 2,33 | 3    | 3,4 | 33 | 43 | 10 | 7  | 10 | 5  | 10 | 2,6 | 10 |
| 365 | Male    | 20 | 1  | 48 | 19 | 2,67 | 4,17 | 2    | 1,2 | 25 | 33 | 13 | 9  | 11 | 9  | 8  | 2,5 | 12 |
| 366 | Male    | 25 | 4  | 56 | 14 | 1,89 | 2    | 3    | 3   | 17 | 22 | 4  | 7  | 11 | 12 | 14 | 2,8 | 9  |
| 367 | Male    | 21 | 4  | 14 | 26 | 4,83 | 4,5  | 5    | 4,4 | 33 | 26 | 5  | 3  | 8  | 2  | 10 | 1,8 | 3  |
| 368 | Male    | 19 | 1  | 49 | 14 | 2,5  | 1    | 3,25 | 2,4 | 23 | 30 | 6  | 9  | 14 | 8  | 13 | 3,2 | 7  |
| 369 | Male    | 20 | 1  | 52 | 11 | 2,83 | 3    | 1,75 | 3,4 | 19 | 30 | 8  | 5  | 11 | 10 | 10 | 3,4 | 9  |
| 370 | Male    | 17 | 1  | 52 | 21 | 3,44 | 1,33 | 1,75 | 1,4 | 37 | 40 | 7  | 8  | 8  | 8  | 8  | 2,3 | 10 |
| 371 | Male    | 17 | 1  | 59 | 15 | 2,17 | 1    | 1    | 1   | 22 | 22 | 10 | 8  | 8  | 12 | 10 | 3,2 | 12 |
| 372 | Male    | 17 | 1  | 36 | 20 | 3    | 3    | 3    | 3   | 19 | 31 | 9  | 6  | 8  | 8  | 9  | 2,9 | 10 |
| 373 | Male    | 18 | 1  | 52 | 17 | 3    | 3    | 3    | 3   | 27 | 36 | 8  | 8  | 8  | 8  | 8  | 2,8 | 9  |
| 374 | Male    | 20 | 1  | 50 | 11 | 2,5  | 1,67 | 2,25 | 2,6 | 17 | 21 | 4  | 6  | 11 | 11 | 10 | 3,2 | 10 |
| 375 | Male    | 18 | 1  | 56 | 6  | 1,94 | 2,67 | 1,75 | 2   | 21 | 29 | 7  | 5  | 11 | 12 | 8  | 3,3 | 10 |
| 376 | Male    | 18 | 1  | 53 | 13 | 2,61 | 3,17 | 3    | 3   | 20 | 28 | 7  | 10 | 6  | 13 | 10 | 3,5 | 9  |
| 377 | Male    | 18 | 1  | 65 | 15 | 2,83 | 3,5  | 4,5  | 2,8 | 32 | 30 | 6  | 10 | 7  | 6  | 10 | 2,3 | 7  |
| 378 | Male    | 19 | 2  | 61 | 13 | 1,89 | 1    | 1,75 | 3   | 20 | 35 | 12 | 6  | 14 | 14 | 11 | 3,9 | 10 |
| 379 | Male    | 17 | 1  | 63 | 3  | 1,94 | 1    | 1    | 1   | 15 | 29 | 8  | 8  | 9  | 14 | 10 | 3,8 | 12 |
| 380 | Male    | 22 | 2  | 39 | 16 | 2,39 | 3,5  | 2,75 | 3,2 | 28 | 33 | 7  | 8  | 8  | 11 | 10 | 2,3 | 8  |
| 381 | Male    | 19 | 1  | 36 | 28 | 3,61 | 3,83 | 3,5  | 4   | 31 | 26 | 8  | 9  | 7  | 5  | 11 | 2,2 | 7  |
| 382 | Male    | 22 | 1  | 56 | 13 | 3    | 3    | 3    | 3   | 21 | 27 | 8  | 8  | 8  | 8  | 8  | 3,5 | 12 |

|     |        |    |   |    |    |      |      |      |     |    |    |    |    |    |    |    |     |    |
|-----|--------|----|---|----|----|------|------|------|-----|----|----|----|----|----|----|----|-----|----|
| 383 | Female | 23 | 3 | 54 | 20 | 2    | 2,83 | 1    | 2,6 | 23 | 36 | 9  | 9  | 7  | 11 | 8  | 2,9 | 12 |
| 384 | Female | 20 | 3 | 51 | 22 | 2,89 | 2,17 | 3,5  | 3,2 | 32 | 41 | 8  | 7  | 8  | 6  | 12 | 2,9 | 9  |
| 385 | Female | 19 | 1 | 60 | 15 | 2,67 | 3,17 | 1,25 | 4   | 19 | 42 | 7  | 12 | 12 | 11 | 11 | 3,6 | 11 |
| 386 | Female | 22 | 3 | 38 | 29 | 3,28 | 4,17 | 2    | 4,2 | 30 | 27 | 9  | 9  | 7  | 6  | 13 | 3,4 | 8  |
| 387 | Male   | 27 | 3 | 49 | 24 | 2,22 | 3,5  | 2    | 3,4 | 22 | 39 | 8  | 7  | 11 | 8  | 9  | 3,3 | 9  |
| 388 | Female | 21 | 4 | 32 | 29 | 3,11 | 4,5  | 4,5  | 5   | 24 | 34 | 8  | 14 | 14 | 9  | 12 | 3,5 | 8  |
| 389 | Male   | 25 | 3 | 48 | 19 | 2,78 | 3,33 | 2,5  | 2,8 | 23 | 42 | 4  | 8  | 9  | 5  | 13 | 2,7 | 9  |
| 390 | Male   | 17 | 1 | 44 | 24 | 2,56 | 1,5  | 1,5  | 2   | 21 | 29 | 8  | 9  | 9  | 4  | 10 | 3,1 | 8  |
| 391 | Female | 21 | 3 | 42 | 18 | 3    | 2,83 | 3,5  | 4,2 | 27 | 39 | 5  | 8  | 6  | 4  | 11 | 2,4 | 7  |
| 392 | Female | 20 | 2 | 42 | 21 | 1,94 | 3,17 | 2,25 | 2   | 25 | 29 | 9  | 12 | 6  | 11 | 14 | 3   | 8  |
| 393 | Female | 19 | 3 | 58 | 10 | 2,61 | 3,83 | 1,5  | 4,4 | 20 | 43 | 8  | 8  | 9  | 10 | 14 | 3,2 | 12 |
| 394 | Female | 18 | 1 | 46 | 12 | 2,5  | 4,17 | 3    | 3,8 | 21 | 33 | 2  | 13 | 12 | 13 | 12 | 2,5 | 5  |
| 395 | Female | 20 | 3 | 55 | 12 | 1,44 | 2,67 | 1,25 | 3   | 16 | 41 | 11 | 11 | 11 | 7  | 10 | 3,4 | 12 |
| 396 | Female | 18 | 2 | 55 | 11 | 1,67 | 1,33 | 1    | 3   | 18 | 36 | 3  | 8  | 14 | 13 | 7  | 3,8 | 10 |
| 397 | Male   | 21 | 2 | 55 | 9  | 2,5  | 3    | 1,5  | 3,8 | 19 | 32 | 4  | 9  | 11 | 14 | 12 | 3,6 | 10 |
| 398 | Female | 21 | 4 | 51 | 20 | 2,94 | 3    | 3,25 | 4   | 23 | 35 | 10 | 6  | 13 | 5  | 7  | 2,7 | 9  |
| 399 | Female | 21 | 3 | 58 | 16 | 2,39 | 2,67 | 2,25 | 3,6 | 19 | 38 | 9  | 9  | 14 | 13 | 11 | 3   | 12 |
| 400 | Male   | 20 | 2 | 49 | 17 | 2,22 | 2,83 | 1    | 3,4 | 25 | 27 | 11 | 8  | 12 | 9  | 12 | 3,3 | 12 |
| 401 | Female | 19 | 1 | 43 | 22 | 2,28 | 2,17 | 1,75 | 2   | 23 | 26 | 6  | 7  | 9  | 4  | 8  | 2,6 | 6  |
| 402 | Male   | 25 | 2 | 40 | 26 | 3,78 | 4,83 | 2,75 | 4,8 | 32 | 33 | 10 | 9  | 9  | 7  | 9  | 3,2 | 7  |
| 403 | Female | 20 | 2 | 54 | 17 | 2,56 | 3,5  | 2,5  | 3,2 | 25 | 36 | 9  | 11 | 11 | 12 | 10 | 3,5 | 12 |
| 404 | Female | 26 | 2 | 53 | 12 | 2,33 | 3,67 | 1,5  | 2,6 | 21 | 37 | 11 | 8  | 13 | 11 | 12 | 3,4 | 12 |
| 405 | Female | 19 | 2 | 46 | 22 | 2,83 | 2,83 | 3    | 3   | 26 | 27 | 9  | 8  | 8  | 8  | 8  | 2,3 | 6  |
| 406 | Male   | 21 | 2 | 48 | 16 | 2,67 | 2,33 | 2,25 | 1,8 | 20 | 26 | 10 | 8  | 13 | 13 | 11 | 3,4 | 11 |
| 407 | Male   | 21 | 3 | 41 | 26 | 1,67 | 3,83 | 1    | 3   | 24 | 31 | 2  | 7  | 14 | 11 | 13 | 2,6 | 6  |
| 408 | Female | 24 | 4 | 47 | 26 | 2,28 | 4    | 2,5  | 4   | 27 | 35 | 11 | 8  | 10 | 12 | 12 | 3   | 9  |
| 409 | Male   | 21 | 1 | 39 | 26 | 4    | 3    | 4    | 4,6 | 25 | 35 | 4  | 9  | 14 | 8  | 9  | 2,5 | 8  |
| 410 | Female | 23 | 3 | 35 | 34 | 3,67 | 4,33 | 4,25 | 3   | 32 | 30 | 2  | 11 | 6  | 2  | 8  | 1,8 | 7  |
| 411 | Female | 21 | 2 | 53 | 14 | 2,94 | 3,33 | 3,75 | 3,4 | 25 | 31 | 11 | 8  | 12 | 9  | 12 | 3   | 11 |
| 412 | Female | 22 | 2 | 50 | 16 | 3    | 2    | 1    | 2,2 | 17 | 28 | 11 | 9  | 9  | 11 | 10 | 2,9 | 12 |
| 413 | Male   | 20 | 2 | 57 | 12 | 2,78 | 4    | 2    | 3,6 | 26 | 46 | 13 | 9  | 14 | 8  | 10 | 3,3 | 10 |
| 414 | Female | 21 | 3 | 41 | 26 | 3,5  | 2    | 3    | 4,8 | 31 | 28 | 5  | 4  | 9  | 2  | 13 | 2,5 | 9  |
| 415 | Female | 18 | 1 | 42 | 22 | 2,33 | 3    | 3,25 | 2,8 | 18 | 20 | 5  | 10 | 12 | 9  | 13 | 3,1 | 9  |
| 416 | Female | 20 | 2 | 56 | 21 | 2,72 | 4,83 | 2,25 | 4,2 | 26 | 39 | 10 | 9  | 10 | 12 | 14 | 2,8 | 12 |
| 417 | Female | 19 | 2 | 42 | 26 | 2,83 | 3    | 1    | 4   | 31 | 31 | 6  | 7  | 13 | 5  | 13 | 2,3 | 9  |
| 418 | Male   | 23 | 2 | 42 | 17 | 2    | 2,17 | 2,5  | 1,4 | 30 | 39 | 3  | 9  | 8  | 7  | 11 | 3   | 11 |
| 419 | Female | 20 | 2 | 34 | 27 | 2,56 | 4,33 | 5    | 3   | 35 | 34 | 4  | 10 | 10 | 6  | 12 | 1,4 | 7  |
| 420 | Male   | 21 | 3 | 70 | 18 | 1,11 | 2    | 2,25 | 2   | 13 | 13 | 14 | 8  | 14 | 14 | 14 | 4   | 9  |
| 421 | Male   | 20 | 2 | 60 | 9  | 2,33 | 3,67 | 3    | 3,4 | 20 | 32 | 9  | 13 | 11 | 13 | 11 | 3   | 9  |
| 422 | Female | 22 | 4 | 54 | 15 | 2,33 | 3,83 | 3    | 2,8 | 26 | 37 | 14 | 8  | 14 | 12 | 12 | 3,4 | 12 |
| 423 | Female | 21 | 2 | 57 | 13 | 2,61 | 4    | 2,75 | 3,2 | 24 | 34 | 10 | 8  | 9  | 10 | 8  | 2,9 | 10 |
| 424 | Female | 20 | 2 | 49 | 25 | 2,56 | 4,33 | 2,25 | 4   | 25 | 41 | 9  | 9  | 14 | 7  | 11 | 3,1 | 12 |
| 425 | Male   | 23 | 2 | 55 | 10 | 2,06 | 3,5  | 2,5  | 4   | 23 | 39 | 8  | 7  | 12 | 14 | 10 | 3,1 | 8  |
| 426 | Female | 20 | 2 | 53 | 21 | 2,06 | 4,5  | 2,75 | 2,4 | 26 | 38 | 13 | 9  | 14 | 8  | 11 | 3,3 | 11 |
| 427 | Female | 18 | 2 | 32 | 32 | 3,67 | 3,83 | 3,75 | 5   | 37 | 39 | 13 | 8  | 13 | 3  | 11 | 2   | 11 |
| 428 | Female | 20 | 2 | 43 | 30 | 3,33 | 3,5  | 3    | 3,8 | 27 | 32 | 12 | 8  | 12 | 8  | 12 | 2,9 | 9  |
| 429 | Female | 18 | 2 | 58 | 11 | 2,17 | 2,83 | 1    | 2,6 | 21 | 26 | 8  | 8  | 6  | 12 | 14 | 3,1 | 8  |
| 430 | Female | 21 | 2 | 44 | 32 | 2,94 | 4    | 1,75 | 4,4 | 27 | 19 | 9  | 8  | 9  | 3  | 10 | 2   | 8  |
| 431 | Female | 18 | 2 | 51 | 19 | 2    | 2,5  | 3,25 | 2,4 | 21 | 42 | 13 | 9  | 13 | 12 | 13 | 3,4 | 12 |
| 432 | Female | 20 | 2 | 47 | 22 | 1,28 | 4,67 | 3,5  | 4,2 | 22 | 32 | 7  | 3  | 12 | 7  | 13 | 2,9 | 11 |
| 433 | Female | 20 | 2 | 48 | 37 | 3,78 | 3,67 | 2,5  | 4,2 | 40 | 28 | 4  | 6  | 9  | 3  | 11 | 1,7 | 5  |
| 434 | Female | 21 | 1 | 42 | 23 | 3    | 4,17 | 3    | 4,8 | 25 | 41 | 8  | 7  | 11 | 5  | 13 | 2,8 | 8  |
| 435 | Male   | 19 | 1 | 46 | 21 | 2,56 | 3,5  | 2,5  | 2,6 | 30 | 29 | 10 | 8  | 9  | 10 | 14 | 3,1 | 10 |
| 436 | Female | 19 | 2 | 57 | 19 | 2,11 | 1,83 | 3,25 | 2,4 | 29 | 41 | 14 | 12 | 14 | 9  | 14 | 3,7 | 12 |
| 437 | Female | 20 | 2 | 29 | 33 | 3,61 | 4,33 | 4,5  | 5   | 32 | 29 | 2  | 6  | 11 | 12 | 14 | 2,3 | 3  |
| 438 | Female | 22 | 4 | 36 | 35 | 3,56 | 2,33 | 3,75 | 4,4 | 31 | 32 | 7  | 9  | 9  | 7  | 10 | 2,5 | 11 |
| 439 | Female | 18 | 2 | 47 | 19 | 3    | 2,33 | 1,75 | 4   | 17 | 31 | 12 | 8  | 14 | 7  | 12 | 3   | 9  |
| 440 | Male   | 20 | 2 | 59 | 10 | 2,06 | 2,33 | 1    | 1   | 22 | 30 | 11 | 9  | 13 | 14 | 14 | 3,9 | 12 |
| 441 | Female | 19 | 2 | 55 | 18 | 2,33 | 3    | 2,25 | 3,2 | 41 | 41 | 10 | 8  | 14 | 9  | 12 | 3,1 | 10 |
| 442 | Male   | 19 | 2 | 48 | 19 | 2,72 | 3,17 | 2,75 | 2,6 | 13 | 13 | 6  | 6  | 8  | 11 | 9  | 2,9 | 9  |
| 443 | Male   | 23 | 2 | 45 | 21 | 3,72 | 3,67 | 2,75 | 4,6 | 28 | 35 | 12 | 8  | 7  | 10 | 11 | 2,8 | 6  |
| 444 | Male   | 18 | 2 | 48 | 26 | 2,67 | 3,67 | 1    | 2   | 21 | 32 | 4  | 9  | 9  | 12 | 7  | 2,9 | 11 |
| 445 | Male   | 18 | 2 | 50 | 19 | 3,06 | 1    | 1,75 | 3,4 | 25 | 27 | 8  | 10 | 9  | 8  | 10 | 2,9 | 12 |
| 446 | Male   | 19 | 2 | 38 | 25 | 3,11 | 2,5  | 3    | 3,8 | 30 | 32 | 2  | 4  | 7  | 12 | 11 | 2,7 | 8  |

|     |        |    |    |    |    |      |      |      |     |    |    |    |    |    |    |    |     |    |
|-----|--------|----|----|----|----|------|------|------|-----|----|----|----|----|----|----|----|-----|----|
| 447 | Male   | 19 | 2  | 53 | 17 | 2,72 | 3,33 | 2,25 | 2,2 | 25 | 32 | 6  | 10 | 10 | 12 | 9  | 3,3 | 9  |
| 448 | Female | 20 | 4  | 52 | 12 | 3,22 | 1,83 | 1    | 3   | 19 | 44 | 5  | 10 | 14 | 13 | 10 | 3,3 | 12 |
| 449 | Female | 17 | 1  | 41 | 26 | 3,78 | 3,67 | 3,25 | 4,6 | 26 | 32 | 4  | 8  | 12 | 6  | 9  | 2,2 | 8  |
| 450 | Male   | 21 | 4  | 50 | 25 | 3,5  | 4    | 3    | 3,8 | 25 | 34 | 4  | 9  | 10 | 13 | 11 | 3   | 9  |
| 451 | Female | 19 | 2  | 45 | 19 | 2,33 | 1,83 | 1,25 | 3,2 | 18 | 22 | 7  | 10 | 10 | 9  | 7  | 3   | 10 |
| 452 | Female | 20 | 2  | 54 | 15 | 2,28 | 2,33 | 1,5  | 1,4 | 21 | 37 | 8  | 7  | 11 | 6  | 13 | 3,1 | 9  |
| 453 | Male   | 20 | 2  | 49 | 17 | 3,06 | 4,17 | 2,75 | 4,4 | 29 | 34 | 8  | 12 | 7  | 7  | 10 | 2,4 | 9  |
| 454 | Male   | 20 | 1  | 50 | 14 | 2,17 | 2,5  | 2,75 | 2,2 | 29 | 35 | 9  | 10 | 10 | 8  | 7  | 3,1 | 10 |
| 455 | Female | 20 | 3  | 56 | 10 | 2,17 | 3,33 | 2,75 | 2,4 | 19 | 37 | 7  | 9  | 14 | 10 | 9  | 3,6 | 12 |
| 456 | Female | 19 | 2  | 57 | 18 | 2,78 | 3,83 | 2,5  | 3,4 | 25 | 39 | 12 | 9  | 10 | 8  | 13 | 3,4 | 11 |
| 457 | Female | 20 | 2  | 53 | 23 | 3,11 | 3,83 | 2,75 | 3,2 | 25 | 46 | 9  | 11 | 6  | 8  | 14 | 3   | 12 |
| 458 | Female | 19 | 2  | 42 | 23 | 2,61 | 2,33 | 3    | 3   | 36 | 36 | 3  | 9  | 8  | 7  | 9  | 3   | 7  |
| 459 | Male   | 22 | 2  | 40 | 22 | 3,61 | 3,17 | 4,25 | 2,6 | 26 | 30 | 12 | 6  | 11 | 9  | 14 | 2,2 | 11 |
| 460 | Male   | 23 | 3  | 45 | 24 | 3    | 5    | 5    | 5   | 36 | 32 | 3  | 12 | 6  | 10 | 9  | 2,8 | 8  |
| 461 | Female | 19 | 1  | 59 | 14 | 2,22 | 1,83 | 1    | 3,2 | 20 | 36 | 9  | 11 | 14 | 8  | 14 | 3   | 11 |
| 462 | Female | 20 | 2  | 31 | 29 | 3,72 | 1    | 3,25 | 4,4 | 23 | 34 | 14 | 10 | 9  | 6  | 10 | 2,3 | 11 |
| 463 | Female | 18 | 1  | 63 | 12 | 1,89 | 3,33 | 1,75 | 4,2 | 23 | 38 | 9  | 11 | 12 | 13 | 12 | 3,2 | 10 |
| 464 | Male   | 19 | 1  | 50 | 13 | 2,67 | 2,5  | 2,75 | 2,8 | 21 | 27 | 6  | 5  | 8  | 8  | 6  | 3,1 | 10 |
| 465 | Male   | 19 | 1  | 41 | 29 | 3,28 | 4,5  | 3,5  | 4,2 | 30 | 40 | 13 | 9  | 13 | 6  | 12 | 3,2 | 8  |
| 466 | Female | 25 | 1  | 41 | 29 | 3,78 | 4    | 4    | 4,4 | 35 | 31 | 9  | 7  | 8  | 3  | 12 | 2,4 | 4  |
| 467 | Female | 21 | 2  | 34 | 26 | 3,78 | 3,67 | 2,25 | 4,2 | 30 | 32 | 13 | 12 | 10 | 10 | 8  | 2,5 | 10 |
| 468 | Female | 18 | 1  | 34 | 27 | 3,5  | 2,17 | 1,25 | 4,6 | 29 | 27 | 8  | 6  | 9  | 7  | 9  | 2,4 | 11 |
| 469 | Female | 22 | 2  | 38 | 28 | 2,94 | 4,17 | 2,25 | 3,6 | 26 | 26 | 2  | 10 | 8  | 6  | 7  | 2,3 | 7  |
| 470 | Female | 21 | 1  | 54 | 16 | 1,89 | 3,83 | 1,25 | 3,4 | 24 | 42 | 11 | 9  | 13 | 8  | 10 | 3,1 | 12 |
| 471 | Male   | 24 | 2  | 38 | 26 | 3,39 | 3,33 | 2    | 4,6 | 29 | 38 | 8  | 2  | 9  | 11 | 13 | 2,6 | 9  |
| 472 | Male   | 23 | 1  | 55 | 16 | 2,28 | 2,83 | 1    | 3,2 | 16 | 21 | 9  | 8  | 11 | 14 | 9  | 3,6 | 10 |
| 473 | Male   | 22 | 4  | 54 | 18 | 2,67 | 2,5  | 1,5  | 3,8 | 26 | 28 | 11 | 5  | 13 | 9  | 10 | 3   | 9  |
| 474 | Male   | 21 | 2  | 55 | 18 | 2,78 | 2,67 | 2    | 2,6 | 26 | 33 | 8  | 7  | 12 | 12 | 8  | 2,9 | 9  |
| 475 | Male   | 19 | 1  | 49 | 14 | 2,44 | 2,83 | 1,5  | 2,6 | 18 | 27 | 9  | 14 | 8  | 9  | 13 | 3,2 | 10 |
| 476 | Male   | 19 | 1  | 54 | 12 | 2    | 2,33 | 2,5  | 2,2 | 19 | 33 | 9  | 11 | 12 | 8  | 12 | 2,9 | 10 |
| 477 | Male   | 20 | 2  | 53 | 22 | 2,78 | 3,33 | 3,25 | 3,6 | 22 | 37 | 11 | 8  | 12 | 11 | 12 | 3,4 | 10 |
| 478 | Female | 20 | 2  | 46 | 16 | 2,67 | 2,17 | 3,5  | 3,4 | 29 | 40 | 4  | 8  | 12 | 8  | 10 | 2,4 | 10 |
| 479 | Female | 18 | 1  | 51 | 20 | 2,44 | 4,17 | 2    | 2,8 | 18 | 35 | 10 | 10 | 12 | 11 | 14 | 2,6 | 6  |
| 480 | Female | 23 | 1  | 47 | 22 | 3,39 | 2    | 1,5  | 3,4 | 24 | 32 | 6  | 10 | 9  | 7  | 10 | 2,4 | 7  |
| 481 | Female | 19 | 1  | 45 | 32 | 3,61 | 4,83 | 5    | 3,4 | 33 | 30 | 3  | 8  | 9  | 5  | 11 | 1,6 | 9  |
| 482 | Male   | 20 | 2  | 44 | 22 | 2,28 | 4    | 3,25 | 4,6 | 31 | 34 | 9  | 8  | 12 | 12 | 11 | 3   | 8  |
| 483 | Female | 20 | 2  | 57 | 11 | 1,61 | 3,17 | 1    | 3,8 | 19 | 48 | 11 | 9  | 8  | 12 | 14 | 3,4 | 12 |
| 484 | Female | 18 | 2  | 43 | 26 | 1,94 | 2,83 | 1    | 2,4 | 21 | 30 | 9  | 12 | 12 | 9  | 11 | 3,6 | 12 |
| 485 | Female | 19 | 1  | 59 | 14 | 3,44 | 2,5  | 3    | 2,8 | 30 | 34 | 6  | 8  | 12 | 7  | 4  | 2,2 | 8  |
| 486 | Female | 19 | 1  | 38 | 22 | 2,06 | 4,17 | 4,25 | 2,6 | 30 | 26 | 13 | 5  | 8  | 6  | 12 | 2,4 | 8  |
| 487 | Female | 17 | 1  | 50 | 15 | 2,61 | 1,5  | 1    | 3,2 | 25 | 32 | 9  | 9  | 9  | 9  | 11 | 2,6 | 11 |
| 488 | Female | 18 | 2  | 42 | 17 | 2,5  | 2,83 | 1    | 2,4 | 13 | 25 | 7  | 9  | 12 | 9  | 9  | 2,8 | 9  |
| 489 | Male   | 18 | 2  | 58 | 22 | 2,94 | 2,5  | 1,5  | 2,4 | 28 | 41 | 8  | 4  | 8  | 10 | 13 | 2,9 | 12 |
| 490 | Male   | 22 | 2  | 53 | 13 | 1,83 | 3,5  | 2    | 3,8 | 26 | 44 | 7  | 7  | 11 | 13 | 12 | 3,1 | 10 |
| 491 | Female | 22 | 3  | 54 | 14 | 2,94 | 2,67 | 2,5  | 2,8 | 26 | 33 | 12 | 9  | 11 | 11 | 14 | 3,1 | 12 |
| 492 | Male   | 20 | 2  | 34 | 26 | 3,78 | 3,5  | 4,5  | 4   | 24 | 20 | 3  | 13 | 7  | 12 | 7  | 2,1 | 6  |
| 493 | Male   | 18 | 2  | 51 | 15 | 3,5  | 1    | 2,25 | 4,6 | 26 | 30 | 5  | 7  | 8  | 6  | 12 | 2,3 | 9  |
| 494 | Male   | 21 | 2  | 50 | 15 | 2,28 | 1,33 | 1,75 | 3,6 | 25 | 36 | 9  | 8  | 13 | 12 | 10 | 2,8 | 9  |
| 495 | Male   | 18 | 1  | 61 | 8  | 1,83 | 3,67 | 1,5  | 1   | 24 | 36 | 9  | 12 | 14 | 11 | 11 | 3,8 | 11 |
| 496 | Female | 18 | 1  | 48 | 16 | 2,56 | 2,5  | 1,25 | 1,2 | 21 | 31 | 8  | 8  | 11 | 8  | 7  | 2,6 | 9  |
| 497 | Female | 19 | 2  | 24 | 37 | 3,5  | 4,83 | 3,25 | 4,6 | 32 | 30 | 4  | 10 | 12 | 8  | 7  | 2,2 | 6  |
| 498 | Female | 18 | 2  | 49 | 22 | 3,06 | 2,83 | 3,5  | 4   | 26 | 33 | 8  | 8  | 8  | 5  | 13 | 3,3 | 9  |
| 499 | Female | 26 | 2  | 38 | 22 | 2,33 | 1,67 | 1,75 | 3,2 | 22 | 37 | 9  | 8  | 10 | 7  | 14 | 3,2 | 8  |
| 500 | Male   | 21 | 5+ | 50 | 22 | 2,89 | 3,83 | 2    | 4,2 | 24 | 31 | 13 | 6  | 14 | 11 | 9  | 3,3 | 11 |
| 501 | Male   | 19 | 2  | 40 | 26 | 3,44 | 2,33 | 1,25 | 4   | 20 | 31 | 7  | 11 | 11 | 12 | 11 | 2,8 | 6  |
| 502 | Male   | 21 | 4  | 44 | 23 | 2,89 | 2,5  | 2,5  | 4,4 | 20 | 39 | 14 | 8  | 8  | 9  | 13 | 2,9 | 9  |
| 503 | Male   | 23 | 1  | 51 | 15 | 1,72 | 2,17 | 1    | 1   | 31 | 47 | 9  | 8  | 6  | 8  | 8  | 2,3 | 11 |
| 504 | Male   | 17 | 1  | 39 | 24 | 3,11 | 1,83 | 2,25 | 1,6 | 27 | 16 | 11 | 7  | 4  | 14 | 14 | 3,3 | 12 |
| 505 | Male   | 20 | 3  | 57 | 13 | 1,5  | 2,5  | 2,75 | 3,8 | 28 | 38 | 7  | 7  | 10 | 14 | 7  | 3,4 | 12 |
| 506 | Male   | 17 | 1  | 30 | 31 | 2,94 | 3,5  | 3,75 | 2,6 | 29 | 22 | 8  | 9  | 8  | 3  | 6  | 2,3 | 3  |
| 507 | Male   | 22 | 4  | 53 | 16 | 2,28 | 3,5  | 3    | 3,8 | 21 | 29 | 9  | 9  | 12 | 13 | 11 | 3,2 | 10 |
| 508 | Male   | 21 | 4  | 55 | 24 | 2,94 | 1,5  | 1,5  | 3,8 | 22 | 40 | 6  | 8  | 7  | 13 | 8  | 2,8 | 7  |
| 509 | Male   | 19 | 1  | 51 | 14 | 2,5  | 3,33 | 2    | 2,6 | 18 | 25 | 9  | 6  | 10 | 9  | 11 | 3,4 | 10 |
| 510 | Male   | 24 | 4  | 48 | 21 | 2,67 | 3,67 | 3,25 | 2,8 | 26 | 28 | 11 | 9  | 10 | 7  | 9  | 2,4 | 9  |



|     |        |    |    |    |    |      |      |      |     |    |    |    |    |    |    |    |     |    |
|-----|--------|----|----|----|----|------|------|------|-----|----|----|----|----|----|----|----|-----|----|
| 511 | Male   | 21 | 2  | 39 | 25 | 2,89 | 3,33 | 1,25 | 3   | 27 | 27 | 4  | 9  | 13 | 13 | 9  | 2,4 | 7  |
| 512 | Male   | 25 | 4  | 43 | 24 | 1,72 | 1,67 | 3,25 | 2   | 27 | 34 | 10 | 5  | 7  | 6  | 12 | 2,3 | 6  |
| 513 | Male   | 20 | 1  | 56 | 18 | 2,94 | 2,33 | 2,75 | 3   | 22 | 27 | 7  | 9  | 12 | 9  | 9  | 3   | 8  |
| 514 | Female | 21 | 4  | 37 | 27 | 3,61 | 3,5  | 3,25 | 3,2 | 29 | 21 | 10 | 7  | 8  | 7  | 11 | 1,9 | 11 |
| 515 | Male   | 22 | 3  | 53 | 10 | 2,72 | 2,83 | 1,25 | 1,8 | 24 | 32 | 4  | 8  | 7  | 14 | 5  | 2,7 | 12 |
| 516 | Male   | 18 | 1  | 55 | 25 | 2,28 | 2,5  | 1    | 2,8 | 23 | 36 | 9  | 10 | 12 | 11 | 12 | 3,2 | 12 |
| 517 | Male   | 20 | 4  | 44 | 27 | 3,5  | 2,67 | 2,5  | 4   | 35 | 24 | 3  | 8  | 2  | 8  | 13 | 2,1 | 6  |
| 518 | Male   | 23 | 4  | 54 | 13 | 2,5  | 2,5  | 2,25 | 3   | 17 | 33 | 9  | 8  | 10 | 12 | 12 | 3,3 | 10 |
| 519 | Male   | 20 | 1  | 56 | 9  | 2,39 | 2,33 | 2    | 2,6 | 24 | 28 | 9  | 9  | 11 | 8  | 11 | 2,9 | 11 |
| 520 | Male   | 23 | 2  | 43 | 22 | 3    | 2,33 | 1    | 3,4 | 23 | 29 | 7  | 8  | 9  | 8  | 7  | 2,2 | 9  |
| 521 | Male   | 17 | 1  | 44 | 18 | 3,06 | 2,17 | 1,5  | 3,2 | 24 | 27 | 8  | 8  | 5  | 6  | 9  | 2,7 | 8  |
| 522 | Male   | 21 | 4  | 48 | 20 | 2,83 | 2    | 2,25 | 3   | 25 | 30 | 3  | 8  | 11 | 8  | 12 | 2,3 | 9  |
| 523 | Male   | 21 | 4  | 50 | 13 | 2,5  | 1,5  | 1    | 2,4 | 25 | 25 | 8  | 8  | 9  | 13 | 13 | 3,4 | 12 |
| 524 | Male   | 18 | 1  | 59 | 11 | 2,28 | 2,67 | 1,5  | 1,2 | 23 | 38 | 12 | 7  | 14 | 10 | 6  | 3,7 | 12 |
| 525 | Female | 21 | 4  | 39 | 13 | 3,44 | 4,17 | 2,5  | 4,6 | 28 | 37 | 8  | 9  | 12 | 10 | 6  | 3,3 | 8  |
| 526 | Male   | 23 | 4  | 53 | 10 | 2,56 | 1,33 | 2    | 1,8 | 19 | 29 | 7  | 6  | 10 | 12 | 9  | 3,2 | 8  |
| 527 | Male   | 18 | 2  | 40 | 23 | 2,72 | 2,17 | 2,25 | 3   | 25 | 28 | 5  | 8  | 8  | 9  | 11 | 2,7 | 7  |
| 528 | Male   | 21 | 3  | 42 | 25 | 2,89 | 3,83 | 2,5  | 4,2 | 29 | 27 | 8  | 9  | 12 | 11 | 11 | 2,7 | 9  |
| 529 | Male   | 19 | 3  | 58 | 12 | 2,22 | 3,5  | 2    | 2   | 16 | 26 | 5  | 7  | 14 | 14 | 9  | 3,5 | 9  |
| 530 | Male   | 21 | 5+ | 52 | 27 | 3    | 2,33 | 1    | 5   | 28 | 44 | 14 | 10 | 14 | 11 | 11 | 4   | 10 |
| 531 | Male   | 17 | 1  | 48 | 13 | 2,94 | 2,5  | 1,5  | 3,8 | 22 | 28 | 13 | 7  | 8  | 12 | 9  | 3,1 | 8  |
| 532 | Male   | 21 | 1  | 52 | 14 | 2    | 2,17 | 2,25 | 1,4 | 26 | 45 | 7  | 8  | 8  | 13 | 13 | 3,7 | 12 |
| 533 | Male   | 19 | 2  | 53 | 16 | 2,72 | 2,33 | 2    | 4   | 23 | 34 | 8  | 8  | 11 | 12 | 12 | 2,9 | 8  |
| 534 | Male   | 22 | 2  | 53 | 11 | 2,28 | 3    | 1,5  | 2,2 | 18 | 33 | 9  | 12 | 10 | 13 | 11 | 3,2 | 12 |
| 535 | Male   | 19 | 2  | 54 | 24 | 3,11 | 4    | 3,25 | 4   | 21 | 24 | 10 | 7  | 12 | 12 | 9  | 2,5 | 9  |
| 536 | Male   | 20 | 1  | 59 | 14 | 2,44 | 3,67 | 1,5  | 3,6 | 20 | 33 | 11 | 7  | 12 | 12 | 13 | 3,7 | 12 |
| 537 | Male   | 18 | 1  | 52 | 18 | 2,78 | 2    | 2,5  | 2,4 | 20 | 31 | 5  | 6  | 9  | 12 | 12 | 3,2 | 10 |
| 538 | Male   | 17 | 1  | 55 | 18 | 3,33 | 1,67 | 2    | 4,2 | 25 | 24 | 5  | 9  | 13 | 11 | 10 | 2,3 | 9  |
| 539 | Female | 17 | 1  | 55 | 14 | 2,33 | 2,83 | 2    | 3,2 | 27 | 31 | 6  | 5  | 12 | 11 | 11 | 2,9 | 12 |
| 540 | Male   | 21 | 4  | 49 | 16 | 2,44 | 3,17 | 2,5  | 1,8 | 22 | 37 | 13 | 6  | 8  | 11 | 12 | 3,4 | 11 |
| 541 | Male   | 17 | 1  | 45 | 21 | 2,33 | 1,17 | 2,5  | 3,4 | 27 | 23 | 8  | 5  | 4  | 10 | 7  | 2,9 | 6  |
| 542 | Male   | 23 | 2  | 29 | 27 | 3,5  | 2,33 | 1,75 | 4,4 | 25 | 21 | 2  | 11 | 8  | 3  | 8  | 1,2 | 4  |
| 543 | Female | 22 | 4  | 48 | 23 | 2,72 | 2,17 | 1,5  | 4   | 24 | 37 | 10 | 10 | 12 | 9  | 13 | 2,8 | 12 |
| 544 | Female | 23 | 1  | 54 | 21 | 2,5  | 2,5  | 1    | 3,4 | 19 | 31 | 11 | 9  | 13 | 12 | 13 | 2,9 | 12 |
| 545 | Female | 41 | 2  | 47 | 25 | 2,44 | 2    | 2    | 2   | 29 | 48 | 9  | 9  | 11 | 12 | 13 | 3,7 | 12 |
| 546 | Female | 22 | 4  | 46 | 24 | 1,83 | 3,83 | 2,75 | 3,8 | 25 | 39 | 10 | 7  | 13 | 8  | 13 | 3,5 | 12 |
| 547 | Female | 36 | 4  | 68 | 14 | 2,28 | 1    | 1,75 | 3,8 | 19 | 41 | 14 | 8  | 14 | 14 | 14 | 4   | 12 |
| 548 | Male   | 23 | 3  | 38 | 30 | 3,44 | 3,67 | 3,75 | 3,6 | 36 | 35 | 8  | 8  | 8  | 7  | 8  | 2,1 | 7  |
| 549 | Female | 22 | 3  | 32 | 31 | 3,78 | 3,83 | 3,75 | 5   | 26 | 32 | 10 | 9  | 14 | 10 | 11 | 2,3 | 8  |
| 550 | Female | 24 | 3  | 43 | 21 | 3,17 | 4,17 | 2,25 | 4,2 | 21 | 31 | 7  | 9  | 14 | 7  | 10 | 2,5 | 6  |
| 551 | Female | 22 | 4  | 68 | 16 | 2,11 | 3,5  | 1    | 2,8 | 22 | 45 | 8  | 10 | 13 | 6  | 13 | 3,1 | 10 |
| 552 | Female | 20 | 4  | 44 | 20 | 3,33 | 2,83 | 3,25 | 2,6 | 36 | 37 | 13 | 4  | 9  | 7  | 8  | 3   | 12 |
| 553 | Female | 23 | 4  | 49 | 25 | 3,72 | 4    | 2,5  | 4,4 | 26 | 34 | 8  | 10 | 8  | 10 | 9  | 2,7 | 9  |
| 554 | Female | 21 | 3  | 42 | 21 | 2,17 | 3,67 | 3,75 | 4   | 22 | 34 | 11 | 9  | 9  | 13 | 9  | 3,5 | 12 |
| 555 | Female | 19 | 2  | 51 | 22 | 2,83 | 3    | 2    | 3,8 | 23 | 36 | 12 | 11 | 10 | 10 | 13 | 3,3 | 8  |
| 556 | Female | 19 | 3  | 61 | 17 | 2,67 | 3,17 | 2,5  | 2,6 | 20 | 44 | 14 | 8  | 13 | 9  | 11 | 2,7 | 11 |
| 557 | Female | 19 | 3  | 33 | 33 | 3,17 | 1    | 1    | 1   | 29 | 29 | 4  | 8  | 7  | 2  | 12 | 1,3 | 6  |
| 558 | Female | 18 | 1  | 28 | 26 | 3,83 | 3,67 | 4,25 | 5   | 31 | 27 | 2  | 6  | 13 | 2  | 7  | 1,3 | 4  |
| 559 | Female | 40 | 3  | 55 | 10 | 2,22 | 1,33 | 1,75 | 3,8 | 21 | 38 | 14 | 8  | 14 | 14 | 9  | 3,8 | 12 |
| 560 | Male   | 18 | 2  | 50 | 14 | 3,28 | 4    | 3,75 | 4   | 23 | 28 | 9  | 8  | 10 | 12 | 10 | 2,5 | 8  |
| 561 | Female | 22 | 3  | 47 | 26 | 2,89 | 1,83 | 1,75 | 3,2 | 29 | 35 | 13 | 9  | 7  | 5  | 14 | 2,7 | 12 |
| 562 | Female | 20 | 3  | 43 | 25 | 2,06 | 2,67 | 1    | 2   | 27 | 38 | 5  | 7  | 13 | 8  | 9  | 2,4 | 12 |
| 563 | Female | 22 | 2  | 46 | 26 | 2,61 | 4    | 2    | 2,8 | 21 | 29 | 5  | 7  | 14 | 6  | 10 | 2,3 | 6  |
| 564 | Female | 18 | 1  | 52 | 14 | 2,61 | 2,83 | 2    | 3,2 | 24 | 29 | 13 | 5  | 14 | 9  | 11 | 3,3 | 9  |
| 565 | Female | 20 | 3  | 45 | 23 | 3,22 | 3,33 | 1,5  | 5   | 26 | 37 | 9  | 9  | 14 | 13 | 11 | 2,6 | 11 |
| 566 | Female | 20 | 3  | 46 | 24 | 3    | 1,67 | 1,5  | 2   | 29 | 36 | 10 | 8  | 9  | 6  | 11 | 2,6 | 12 |
| 567 | Male   | 25 | 4  | 56 | 15 | 2,39 | 3,67 | 2,5  | 2,4 | 21 | 38 | 12 | 7  | 13 | 12 | 11 | 3,5 | 8  |
| 568 | Female | 21 | 2  | 52 | 12 | 1,94 | 4,17 | 1,5  | 1   | 22 | 38 | 11 | 7  | 14 | 11 | 9  | 2,9 | 12 |
| 569 | Female | 30 | 4  | 47 | 23 | 2,78 | 3,17 | 2    | 3,4 | 24 | 28 | 7  | 8  | 14 | 3  | 7  | 2,4 | 6  |
| 570 | Female | 19 | 3  | 45 | 26 | 2,78 | 3,67 | 1,5  | 4   | 26 | 35 | 13 | 9  | 13 | 8  | 13 | 3   | 12 |
| 571 | Female | 23 | 4  | 53 | 20 | 3,33 | 2,67 | 2,25 | 3,6 | 21 | 31 | 9  | 9  | 10 | 9  | 10 | 3,1 | 10 |
| 572 | Female | 18 | 2  | 40 | 25 | 2,94 | 2,5  | 2,75 | 3,4 | 25 | 34 | 9  | 8  | 12 | 6  | 4  | 2,4 | 11 |
| 573 | Female | 47 | 3  | 51 | 18 | 2,28 | 2,17 | 1,5  | 3,8 | 22 | 26 | 8  | 7  | 10 | 13 | 7  | 2,9 | 7  |
| 574 | Female | 43 | 1  | 55 | 17 | 2,56 | 2,17 | 2,5  | 3,6 | 21 | 37 | 14 | 7  | 14 | 7  | 10 | 2,4 | 9  |

|     |        |    |    |    |    |      |      |      |     |    |    |    |    |    |    |    |     |    |
|-----|--------|----|----|----|----|------|------|------|-----|----|----|----|----|----|----|----|-----|----|
| 575 | Female | 19 | 2  | 41 | 24 | 2,5  | 3,5  | 2,25 | 2,2 | 31 | 29 | 11 | 10 | 12 | 7  | 10 | 2,6 | 8  |
| 576 | Female | 21 | 3  | 26 | 35 | 4,17 | 2,17 | 5    | 5   | 32 | 30 | 3  | 8  | 14 | 6  | 8  | 1,9 | 9  |
| 577 | Female | 20 | 2  | 54 | 23 | 3,33 | 3,33 | 3,75 | 4,4 | 24 | 35 | 14 | 10 | 13 | 10 | 11 | 3   | 12 |
| 578 | Female | 21 | 3  | 37 | 29 | 3,5  | 4    | 2,75 | 5   | 31 | 33 | 13 | 7  | 10 | 3  | 8  | 2,1 | 8  |
| 579 | Female | 19 | 3  | 55 | 11 | 2,39 | 1    | 1    | 1,6 | 16 | 25 | 9  | 9  | 13 | 12 | 9  | 3,6 | 11 |
| 580 | Male   | 25 | 3  | 29 | 31 | 3,17 | 3,67 | 3,5  | 4,6 | 29 | 20 | 10 | 5  | 8  | 7  | 8  | 2,5 | 9  |
| 581 | Female | 20 | 3  | 52 | 14 | 2,33 | 2,33 | 1,75 | 2,6 | 17 | 31 | 5  | 9  | 12 | 11 | 10 | 2,8 | 9  |
| 582 | Female | 45 | 2  | 69 | 7  | 2,17 | 1,33 | 1    | 2,4 | 17 | 31 | 12 | 9  | 13 | 14 | 9  | 4   | 11 |
| 583 | Male   | 18 | 2  | 43 | 19 | 3    | 3,5  | 3    | 3,8 | 25 | 33 | 12 | 11 | 10 | 11 | 11 | 2,7 | 9  |
| 584 | Female | 20 | 2  | 48 | 15 | 2,72 | 1,67 | 1,25 | 1,2 | 20 | 36 | 5  | 12 | 14 | 13 | 7  | 2,4 | 11 |
| 585 | Female | 26 | 3  | 45 | 26 | 3,28 | 4,5  | 2,75 | 3,4 | 26 | 27 | 13 | 9  | 4  | 9  | 7  | 2,4 | 7  |
| 586 | Female | 19 | 2  | 45 | 24 | 2,44 | 2,17 | 2    | 3,6 | 20 | 35 | 11 | 9  | 14 | 5  | 10 | 2,5 | 8  |
| 587 | Female | 22 | 3  | 60 | 29 | 2,33 | 3,33 | 2    | 4,4 | 30 | 40 | 11 | 9  | 6  | 8  | 13 | 2,9 | 9  |
| 588 | Male   | 22 | 4  | 49 | 25 | 2,5  | 1,83 | 2    | 3,8 | 22 | 36 | 7  | 10 | 11 | 14 | 6  | 3   | 12 |
| 589 | Female | 21 | 4  | 58 | 17 | 3,06 | 2,33 | 2    | 3,2 | 19 | 38 | 4  | 9  | 12 | 9  | 6  | 3,1 | 12 |
| 590 | Female | 20 | 2  | 57 | 27 | 2,39 | 3,17 | 1    | 4   | 25 | 44 | 9  | 9  | 9  | 8  | 13 | 2,6 | 7  |
| 591 | Female | 21 | 3  | 41 | 23 | 2,56 | 1    | 2,25 | 4   | 26 | 30 | 6  | 11 | 10 | 8  | 8  | 2,1 | 11 |
| 592 | Female | 18 | 2  | 40 | 22 | 3,11 | 2    | 1,5  | 3   | 27 | 27 | 9  | 8  | 11 | 5  | 8  | 2,2 | 8  |
| 593 | Female | 23 | 4  | 59 | 17 | 2,06 | 4,33 | 2    | 1   | 24 | 36 | 14 | 9  | 14 | 7  | 12 | 3,1 | 10 |
| 594 | Male   | 52 | 4  | 49 | 14 | 2,33 | 1,83 | 2    | 2,2 | 18 | 34 | 9  | 8  | 5  | 8  | 8  | 3,1 | 10 |
| 595 | Female | 21 | 1  | 54 | 12 | 2,33 | 1,5  | 1,25 | 2,4 | 28 | 39 | 14 | 6  | 12 | 11 | 10 | 3,3 | 11 |
| 596 | Female | 21 | 1  | 55 | 11 | 1,94 | 1,5  | 1,5  | 1,6 | 21 | 37 | 12 | 6  | 13 | 10 | 10 | 3,5 | 9  |
| 597 | Female | 30 | 2  | 56 | 10 | 1,5  | 1,33 | 1    | 1   | 20 | 39 | 10 | 7  | 13 | 10 | 8  | 3,3 | 12 |
| 598 | Female | 38 | 3  | 54 | 23 | 2,94 | 1    | 2,5  | 4,2 | 23 | 43 | 4  | 6  | 12 | 7  | 8  | 3,3 | 12 |
| 599 | Female | 20 | 1  | 56 | 23 | 2,61 | 2,17 | 2    | 2,8 | 29 | 36 | 14 | 9  | 14 | 10 | 13 | 3   | 12 |
| 600 | Female | 36 | 3  | 60 | 10 | 2,72 | 1,33 | 1,75 | 4   | 20 | 37 | 11 | 9  | 14 | 13 | 9  | 3,8 | 11 |
| 601 | Female | 20 | 2  | 59 | 9  | 2,17 | 1,67 | 1    | 1,8 | 19 | 31 | 5  | 8  | 14 | 12 | 9  | 3   | 12 |
| 602 | Female | 23 | 3  | 52 | 16 | 2,5  | 3,67 | 1,5  | 3,4 | 23 | 39 | 8  | 8  | 10 | 10 | 13 | 2,7 | 11 |
| 603 | Female | 22 | 4  | 53 | 15 | 2,89 | 4,17 | 2    | 3,2 | 21 | 37 | 13 | 8  | 9  | 12 | 11 | 3,3 | 12 |
| 604 | Female | 23 | 4  | 45 | 28 | 3,78 | 4    | 2,5  | 5   | 25 | 33 | 10 | 8  | 10 | 7  | 10 | 2,8 | 9  |
| 605 | Female | 21 | 3  | 51 | 29 | 3,28 | 1,33 | 1,5  | 4,2 | 31 | 34 | 10 | 8  | 11 | 5  | 10 | 2,5 | 10 |
| 606 | Female | 24 | 4  | 34 | 27 | 3,28 | 2,17 | 1,75 | 3,6 | 21 | 26 | 3  | 7  | 9  | 6  | 9  | 2,7 | 6  |
| 607 | Male   | 26 | 4  | 66 | 16 | 2,5  | 3,17 | 3    | 3   | 19 | 29 | 6  | 9  | 10 | 13 | 8  | 3,3 | 12 |
| 608 | Female | 37 | 3  | 60 | 20 | 3,06 | 1    | 2    | 3,8 | 17 | 37 | 4  | 12 | 14 | 13 | 10 | 4   | 8  |
| 609 | Female | 21 | 2  | 49 | 16 | 2,61 | 2    | 1,75 | 2,6 | 19 | 33 | 12 | 7  | 9  | 12 | 13 | 2,8 | 9  |
| 610 | Female | 24 | 4  | 55 | 26 | 2,33 | 1    | 1    | 3,4 | 19 | 19 | 11 | 9  | 13 | 11 | 12 | 2,8 | 12 |
| 611 | Female | 21 | 2  | 44 | 22 | 3,11 | 2    | 2,25 | 2,8 | 19 | 27 | 9  | 8  | 10 | 9  | 9  | 2,5 | 9  |
| 612 | Female | 51 | 3  | 64 | 14 | 2,33 | 2,5  | 2,25 | 2,6 | 19 | 40 | 10 | 6  | 9  | 11 | 10 | 3,1 | 8  |
| 613 | Female | 21 | 2  | 48 | 25 | 3,33 | 1,83 | 3,75 | 3,8 | 32 | 35 | 14 | 9  | 10 | 9  | 8  | 2,7 | 12 |
| 614 | Female | 23 | 2  | 44 | 22 | 3,22 | 3,5  | 1,75 | 4   | 21 | 23 | 8  | 8  | 13 | 10 | 12 | 2,8 | 9  |
| 615 | Female | 20 | 2  | 53 | 25 | 2,61 | 3,33 | 2,5  | 3,8 | 24 | 32 | 13 | 8  | 14 | 9  | 14 | 2,6 | 7  |
| 616 | Female | 21 | 1  | 57 | 29 | 2,89 | 3,17 | 3,5  | 4,2 | 31 | 35 | 8  | 7  | 10 | 7  | 12 | 2,6 | 9  |
| 617 | Female | 22 | 5+ | 62 | 10 | 1,94 | 1,33 | 1    | 1,4 | 17 | 39 | 14 | 8  | 14 | 14 | 9  | 3,9 | 11 |
| 618 | Female | 21 | 3  | 57 | 14 | 2,61 | 3    | 2,25 | 3   | 19 | 32 | 10 | 7  | 10 | 12 | 11 | 2,8 | 11 |
| 619 | Male   | 23 | 3  | 31 | 28 | 3,33 | 4,17 | 3,25 | 4,8 | 25 | 24 | 3  | 10 | 11 | 6  | 6  | 1,5 | 7  |
| 620 | Female | 21 | 5+ | 38 | 26 | 3,72 | 4,67 | 1    | 5   | 31 | 33 | 7  | 8  | 11 | 3  | 7  | 2,3 | 8  |
| 621 | Female | 22 | 3  | 47 | 29 | 3,17 | 2    | 1    | 3,6 | 29 | 40 | 8  | 9  | 13 | 10 | 12 | 2,8 | 12 |
| 622 | Female | 20 | 2  | 50 | 12 | 2,17 | 3,5  | 1    | 2,4 | 20 | 36 | 14 | 8  | 10 | 13 | 12 | 3,3 | 12 |
| 623 | Female | 21 | 4  | 48 | 15 | 2,56 | 1    | 1    | 1   | 20 | 34 | 9  | 8  | 12 | 7  | 10 | 3,2 | 12 |
| 624 | Female | 18 | 2  | 55 | 16 | 2,5  | 3,17 | 1,5  | 3,6 | 20 | 47 | 13 | 9  | 13 | 14 | 14 | 3,3 | 9  |
| 625 | Female | 21 | 2  | 52 | 15 | 2,11 | 2,17 | 2,5  | 1,8 | 23 | 39 | 11 | 7  | 14 | 6  | 6  | 3,5 | 9  |
| 626 | Female | 18 | 2  | 49 | 29 | 3,33 | 3,83 | 3,75 | 3,6 | 25 | 26 | 11 | 7  | 10 | 7  | 10 | 2,4 | 8  |
| 627 | Female | 19 | 2  | 54 | 18 | 2,78 | 4,33 | 3,75 | 3,2 | 25 | 33 | 10 | 6  | 11 | 7  | 11 | 2,8 | 9  |
| 628 | Female | 19 | 3  | 45 | 28 | 2,33 | 3,5  | 1,75 | 3,4 | 24 | 29 | 10 | 8  | 13 | 8  | 14 | 2,9 | 11 |
| 629 | Female | 21 | 3  | 54 | 18 | 3,11 | 1,67 | 2    | 3   | 24 | 30 | 9  | 10 | 12 | 8  | 8  | 3   | 9  |
| 630 | Female | 19 | 3  | 53 | 18 | 2,61 | 1,67 | 1    | 1   | 22 | 45 | 8  | 10 | 10 | 14 | 12 | 3   | 12 |
| 631 | Female | 21 | 3  | 34 | 33 | 3,39 | 3,83 | 1,75 | 5   | 26 | 33 | 9  | 8  | 11 | 12 | 12 | 2,4 | 7  |
| 632 | Female | 19 | 3  | 52 | 22 | 3,22 | 3,17 | 2,5  | 4   | 24 | 27 | 10 | 8  | 11 | 10 | 10 | 2,9 | 9  |
| 633 | Female | 19 | 3  | 41 | 20 | 3,06 | 1    | 1    | 3,8 | 26 | 27 | 8  | 10 | 7  | 7  | 8  | 2,3 | 8  |
| 634 | Female | 19 | 3  | 51 | 21 | 2,56 | 2,83 | 1,5  | 3   | 21 | 30 | 4  | 6  | 13 | 8  | 9  | 2,7 | 7  |
| 635 | Female | 19 | 3  | 35 | 25 | 3,39 | 2,17 | 1    | 3,8 | 25 | 33 | 5  | 12 | 11 | 8  | 9  | 2,8 | 7  |
| 636 | Female | 23 | 3  | 35 | 27 | 4    | 3,17 | 2,75 | 4   | 24 | 28 | 6  | 10 | 8  | 5  | 9  | 2,8 | 10 |
| 637 | Male   | 22 | 3  | 49 | 13 | 2,5  | 2,67 | 1,5  | 3,6 | 26 | 33 | 8  | 12 | 9  | 10 | 10 | 3   | 11 |
| 638 | Female | 21 | 3  | 50 | 22 | 2,72 | 3    | 3,25 | 3,4 | 20 | 28 | 10 | 8  | 10 | 10 | 11 | 2,9 | 9  |

|     |        |    |    |    |    |      |      |      |     |    |    |    |    |    |    |    |     |    |
|-----|--------|----|----|----|----|------|------|------|-----|----|----|----|----|----|----|----|-----|----|
| 639 | Female | 22 | 4  | 42 | 25 | 2,83 | 3    | 2    | 4   | 26 | 36 | 8  | 11 | 8  | 3  | 9  | 2,8 | 6  |
| 640 | Female | 20 | 3  | 48 | 25 | 2,56 | 3,83 | 2,75 | 4   | 31 | 37 | 11 | 8  | 12 | 10 | 9  | 3,1 | 12 |
| 641 | Female | 20 | 3  | 32 | 22 | 3,28 | 3,17 | 3    | 4   | 27 | 24 | 3  | 12 | 8  | 3  | 9  | 2,4 | 6  |
| 642 | Female | 21 | 2  | 53 | 27 | 2,11 | 3,67 | 2,25 | 3   | 30 | 39 | 11 | 6  | 13 | 4  | 9  | 3   | 8  |
| 643 | Female | 19 | 2  | 47 | 14 | 2,72 | 2,5  | 1,5  | 3,2 | 19 | 26 | 10 | 8  | 10 | 10 | 8  | 2,3 | 8  |
| 644 | Female | 18 | 2  | 43 | 22 | 2,94 | 3,5  | 3    | 3,8 | 25 | 33 | 7  | 8  | 11 | 8  | 11 | 2,7 | 8  |
| 645 | Female | 18 | 2  | 35 | 28 | 3,67 | 4,33 | 3    | 4   | 22 | 31 | 6  | 11 | 8  | 2  | 7  | 1,9 | 9  |
| 646 | Female | 21 | 2  | 38 | 30 | 3,28 | 2,83 | 3    | 2,8 | 28 | 24 | 7  | 9  | 8  | 7  | 13 | 3,1 | 8  |
| 647 | Female | 55 | 1  | 56 | 13 | 2,33 | 3    | 3    | 2   | 22 | 36 | 10 | 8  | 11 | 12 | 9  | 3,5 | 11 |
| 648 | Female | 23 | 3  | 33 | 30 | 3,94 | 3,5  | 4,25 | 5   | 29 | 24 | 8  | 9  | 5  | 10 | 7  | 2,5 | 9  |
| 649 | Female | 23 | 3  | 40 | 24 | 3,11 | 4    | 2,75 | 4   | 24 | 32 | 10 | 8  | 12 | 5  | 12 | 2,1 | 8  |
| 650 | Female | 19 | 1  | 60 | 6  | 2,17 | 2    | 1,75 | 2,8 | 20 | 42 | 13 | 9  | 9  | 13 | 13 | 3,8 | 12 |
| 651 | Female | 20 | 4  | 52 | 19 | 2,72 | 1,33 | 1,75 | 2,8 | 27 | 37 | 7  | 9  | 10 | 8  | 11 | 2,7 | 10 |
| 652 | Female | 25 | 4  | 50 | 26 | 2,78 | 4,17 | 4,25 | 5   | 23 | 34 | 2  | 9  | 12 | 9  | 8  | 2,9 | 10 |
| 653 | Female | 21 | 4  | 55 | 22 | 3,22 | 1,83 | 3,75 | 4   | 20 | 27 | 7  | 9  | 12 | 10 | 11 | 2,8 | 7  |
| 654 | Female | 19 | 4  | 48 | 23 | 2,67 | 3    | 2,25 | 4   | 26 | 37 | 8  | 8  | 11 | 8  | 7  | 3,2 | 12 |
| 655 | Female | 18 | 2  | 53 | 17 | 1,78 | 1,5  | 1    | 2   | 21 | 35 | 9  | 9  | 14 | 13 | 13 | 3,7 | 11 |
| 656 | Female | 23 | 2  | 43 | 23 | 2,78 | 3    | 3    | 3   | 20 | 25 | 9  | 8  | 12 | 10 | 8  | 2,9 | 9  |
| 657 | Female | 18 | 2  | 52 | 35 | 2,72 | 2,83 | 2,75 | 4,4 | 28 | 35 | 9  | 6  | 12 | 3  | 7  | 3,1 | 10 |
| 658 | Female | 23 | 1  | 37 | 29 | 3,61 | 4    | 2,5  | 4,2 | 28 | 43 | 10 | 10 | 10 | 3  | 7  | 2,9 | 7  |
| 659 | Female | 18 | 2  | 43 | 28 | 3,22 | 3    | 3,25 | 3,6 | 18 | 32 | 10 | 9  | 13 | 6  | 12 | 2,1 | 8  |
| 660 | Female | 20 | 2  | 53 | 13 | 2,56 | 2,5  | 2,25 | 2,2 | 18 | 27 | 9  | 9  | 8  | 11 | 13 | 3,1 | 9  |
| 661 | Female | 21 | 2  | 33 | 29 | 2,94 | 3,5  | 1    | 3,2 | 23 | 24 | 8  | 12 | 8  | 4  | 9  | 1,9 | 7  |
| 662 | Female | 18 | 2  | 39 | 23 | 2,83 | 2,67 | 2,25 | 2,2 | 23 | 30 | 7  | 8  | 10 | 9  | 7  | 2,8 | 9  |
| 663 | Female | 18 | 2  | 53 | 9  | 1,89 | 3    | 3,75 | 3,8 | 22 | 33 | 5  | 8  | 12 | 11 | 9  | 2,6 | 9  |
| 664 | Female | 19 | 2  | 46 | 23 | 2,78 | 3    | 3,25 | 2,4 | 26 | 32 | 9  | 8  | 10 | 7  | 11 | 2,2 | 8  |
| 665 | Female | 18 | 2  | 45 | 20 | 3,28 | 3,67 | 4,25 | 3,4 | 27 | 32 | 7  | 10 | 11 | 5  | 7  | 2,8 | 8  |
| 666 | Female | 19 | 3  | 44 | 23 | 3    | 3,33 | 2    | 4   | 19 | 29 | 13 | 8  | 9  | 8  | 10 | 2,8 | 10 |
| 667 | Female | 19 | 3  | 52 | 27 | 3,11 | 3,5  | 2,5  | 4   | 20 | 38 | 10 | 10 | 13 | 12 | 11 | 2,9 | 12 |
| 668 | Female | 20 | 3  | 67 | 17 | 2,33 | 1    | 1,5  | 3   | 18 | 32 | 9  | 9  | 14 | 13 | 12 | 3,8 | 12 |
| 669 | Female | 23 | 3  | 42 | 22 | 2,89 | 4    | 2,5  | 4   | 20 | 27 | 13 | 8  | 14 | 8  | 9  | 2,7 | 12 |
| 670 | Female | 21 | 3  | 28 | 36 | 3,89 | 4,17 | 3,25 | 5   | 33 | 23 | 8  | 6  | 10 | 6  | 10 | 1,8 | 6  |
| 671 | Female | 21 | 3  | 26 | 38 | 3,78 | 4,5  | 3,25 | 5   | 29 | 21 | 3  | 13 | 6  | 2  | 7  | 1,6 | 6  |
| 672 | Female | 19 | 3  | 54 | 16 | 2,72 | 3,33 | 2,25 | 3,6 | 19 | 36 | 10 | 9  | 9  | 9  | 10 | 3   | 9  |
| 673 | Female | 18 | 2  | 56 | 15 | 2,28 | 3,17 | 2,75 | 3   | 22 | 31 | 12 | 12 | 13 | 13 | 12 | 3   | 11 |
| 674 | Female | 22 | 1  | 52 | 14 | 2,28 | 1,17 | 1,75 | 2,2 | 24 | 32 | 9  | 8  | 12 | 11 | 7  | 3,4 | 9  |
| 675 | Female | 19 | 3  | 47 | 26 | 3,11 | 3,17 | 2,75 | 4   | 25 | 34 | 6  | 7  | 11 | 7  | 8  | 2,8 | 12 |
| 676 | Female | 19 | 1  | 27 | 33 | 2,89 | 4,33 | 3,5  | 4   | 22 | 24 | 8  | 10 | 10 | 3  | 10 | 2,1 | 7  |
| 677 | Female | 22 | 5+ | 49 | 25 | 3    | 4,17 | 2,25 | 3,2 | 27 | 28 | 8  | 8  | 13 | 9  | 10 | 3   | 9  |
| 678 | Female | 22 | 4  | 50 | 27 | 2,61 | 2,67 | 1,25 | 4,8 | 18 | 36 | 10 | 8  | 14 | 12 | 12 | 3,3 | 10 |
| 679 | Female | 17 | 1  | 42 | 27 | 2,94 | 2,5  | 1    | 3,4 | 27 | 28 | 10 | 9  | 13 | 8  | 12 | 2,4 | 12 |
| 680 | Female | 20 | 2  | 53 | 11 | 2,28 | 3,67 | 1    | 3,6 | 22 | 39 | 8  | 12 | 13 | 10 | 10 | 3,1 | 9  |
| 681 | Female | 18 | 2  | 55 | 18 | 2,5  | 2    | 1,25 | 3,2 | 19 | 39 | 8  | 9  | 12 | 9  | 8  | 2,9 | 12 |
| 682 | Female | 33 | 2  | 56 | 14 | 2,89 | 2,83 | 2    | 2,8 | 23 | 40 | 7  | 7  | 11 | 8  | 10 | 2,5 | 12 |
| 683 | Male   | 19 | 2  | 53 | 18 | 3    | 2,33 | 2,25 | 2,4 | 19 | 26 | 8  | 9  | 9  | 10 | 9  | 3   | 12 |
| 684 | Female | 19 | 2  | 55 | 13 | 2,56 | 2,33 | 1    | 2,2 | 21 | 38 | 13 | 8  | 10 | 10 | 8  | 3,6 | 9  |
| 685 | Female | 19 | 2  | 45 | 23 | 2,61 | 3,5  | 2,75 | 3,4 | 20 | 25 | 4  | 10 | 9  | 10 | 6  | 2,5 | 9  |
| 686 | Female | 19 | 2  | 38 | 19 | 2,67 | 3,17 | 4,75 | 2,2 | 22 | 27 | 8  | 6  | 12 | 9  | 9  | 2,3 | 8  |
| 687 | Female | 19 | 3  | 58 | 17 | 2,17 | 1,83 | 1    | 2,2 | 22 | 38 | 13 | 8  | 14 | 11 | 11 | 2,9 | 12 |
| 688 | Female | 17 | 1  | 57 | 16 | 2,44 | 3    | 1,5  | 3,8 | 19 | 32 | 9  | 7  | 13 | 11 | 10 | 3,7 | 9  |
| 689 | Female | 16 | 1  | 39 | 24 | 3,06 | 3,17 | 3    | 2,6 | 21 | 34 | 10 | 8  | 7  | 9  | 11 | 2,7 | 12 |
| 690 | Female | 21 | 4  | 62 | 21 | 3,11 | 3,5  | 2,25 | 3,2 | 21 | 44 | 13 | 8  | 14 | 7  | 13 | 3,6 | 10 |
| 691 | Female | 21 | 4  | 41 | 19 | 3,17 | 2,83 | 2,5  | 4,2 | 26 | 37 | 5  | 6  | 10 | 10 | 9  | 2,6 | 9  |
| 692 | Female | 21 | 2  | 34 | 26 | 3,89 | 3,67 | 2,75 | 4,6 | 28 | 27 | 11 | 8  | 8  | 10 | 8  | 2,3 | 8  |
| 693 | Female | 17 | 1  | 51 | 14 | 2,78 | 3,83 | 2,25 | 3,6 | 23 | 32 | 5  | 7  | 9  | 11 | 5  | 2,9 | 9  |
| 694 | Female | 19 | 3  | 46 | 23 | 3,56 | 2,5  | 3,25 | 3,8 | 25 | 34 | 9  | 8  | 11 | 11 | 8  | 2,9 | 9  |
| 695 | Female | 18 | 2  | 47 | 28 | 3,33 | 3    | 4    | 3,8 | 19 | 26 | 9  | 6  | 14 | 10 | 7  | 2,7 | 8  |
| 696 | Female | 21 | 2  | 43 | 18 | 2,78 | 3,5  | 3    | 3,4 | 27 | 38 | 7  | 9  | 13 | 13 | 10 | 2   | 9  |
| 697 | Female | 20 | 2  | 62 | 19 | 2,11 | 3,5  | 1,75 | 3,4 | 21 | 48 | 12 | 8  | 13 | 7  | 13 | 3,9 | 11 |
| 698 | Female | 22 | 4  | 52 | 16 | 2,44 | 3    | 1    | 3,2 | 20 | 34 | 10 | 9  | 14 | 11 | 12 | 3   | 12 |
| 699 | Female | 23 | 4  | 50 | 17 | 2,33 | 3,17 | 1    | 1,6 | 23 | 32 | 12 | 7  | 7  | 10 | 9  | 2,6 | 9  |
| 700 | Female | 22 | 4  | 44 | 29 | 2,72 | 3,17 | 2,5  | 3,8 | 23 | 26 | 5  | 6  | 11 | 4  | 10 | 2,3 | 7  |
| 701 | Female | 20 | 2  | 56 | 8  | 1,89 | 1,83 | 1    | 1,2 | 18 | 31 | 12 | 10 | 12 | 13 | 12 | 3,2 | 12 |
| 702 | Male   | 22 | 4  | 53 | 16 | 2,72 | 3,5  | 4    | 1,6 | 23 | 32 | 7  | 8  | 14 | 6  | 12 | 2,7 | 8  |

|     |         |    |   |    |    |      |      |      |     |    |    |    |    |    |    |    |     |    |
|-----|---------|----|---|----|----|------|------|------|-----|----|----|----|----|----|----|----|-----|----|
| 703 | Female  | 20 | 4 | 46 | 26 | 2,33 | 3,5  | 2,75 | 3,6 | 26 | 34 | 4  | 8  | 12 | 12 | 11 | 3,2 | 10 |
| 704 | Male    | 21 | 3 | 38 | 19 | 2,89 | 2,67 | 3,5  | 3,6 | 21 | 24 | 5  | 8  | 13 | 7  | 7  | 2,7 | 3  |
| 705 | Female  | 17 | 1 | 55 | 13 | 2,06 | 1,83 | 2    | 2,2 | 26 | 31 | 11 | 10 | 12 | 11 | 14 | 3,3 | 11 |
| 706 | Male    | 18 | 1 | 42 | 20 | 3,11 | 2,67 | 3,25 | 3,8 | 18 | 22 | 2  | 6  | 14 | 13 | 8  | 2,6 | 7  |
| 707 | Male    | 17 | 1 | 60 | 7  | 2,33 | 1,5  | 1,25 | 2,4 | 23 | 31 | 5  | 9  | 12 | 11 | 8  | 3,6 | 9  |
| 708 | Male    | 17 | 1 | 54 | 5  | 1,61 | 2,83 | 1,5  | 3   | 21 | 32 | 4  | 7  | 11 | 12 | 14 | 3,4 | 10 |
| 709 | Female  | 21 | 2 | 43 | 27 | 2,83 | 3,5  | 2,5  | 2,6 | 26 | 19 | 2  | 8  | 9  | 7  | 12 | 2,2 | 9  |
| 710 | Male    | 18 | 1 | 57 | 9  | 2,17 | 1    | 1    | 1,6 | 25 | 39 | 10 | 9  | 14 | 14 | 12 | 3,5 | 12 |
| 711 | Male    | 18 | 1 | 51 | 18 | 1,94 | 2,17 | 2,25 | 2,2 | 27 | 27 | 7  | 5  | 7  | 5  | 12 | 2,7 | 8  |
| 712 | Male    | 18 | 2 | 61 | 12 | 2,22 | 1,5  | 1,5  | 2   | 22 | 32 | 9  | 6  | 12 | 10 | 13 | 3,1 | 8  |
| 713 | Male    | 20 | 2 | 65 | 5  | 1,67 | 2,33 | 1,5  | 1   | 20 | 27 | 7  | 8  | 9  | 14 | 10 | 3,9 | 12 |
| 714 | Male    | 19 | 3 | 39 | 26 | 2,89 | 1,83 | 1,75 | 3,6 | 22 | 31 | 4  | 9  | 14 | 8  | 9  | 2,6 | 9  |
| 715 | Female  | 21 | 1 | 32 | 24 | 2,39 | 5    | 3,5  | 4,2 | 25 | 33 | 11 | 6  | 9  | 7  | 12 | 2   | 12 |
| 716 | Male    | 17 | 1 | 59 | 17 | 2,5  | 1    | 1,25 | 2,8 | 29 | 34 | 8  | 4  | 8  | 10 | 3  | 3   | 8  |
| 717 | Male    | 18 | 2 | 41 | 13 | 2,11 | 1,17 | 2,75 | 3   | 18 | 26 | 4  | 6  | 11 | 13 | 10 | 2,8 | 8  |
| 718 | Male    | 21 | 2 | 52 | 11 | 3,17 | 4,33 | 2,25 | 1,6 | 20 | 34 | 2  | 9  | 9  | 12 | 11 | 2,5 | 8  |
| 719 | Female  | 19 | 3 | 48 | 20 | 3,06 | 2,5  | 2    | 3,6 | 17 | 33 | 10 | 10 | 12 | 14 | 13 | 3,1 | 12 |
| 720 | Male    | 22 | 2 | 32 | 28 | 2,78 | 2,67 | 3    | 4,2 | 21 | 27 | 13 | 7  | 8  | 8  | 13 | 2,9 | 7  |
| 721 | Female  | 22 | 4 | 32 | 35 | 3,78 | 4,5  | 4,25 | 4,6 | 32 | 28 | 13 | 7  | 9  | 7  | 11 | 2,1 | 9  |
| 722 | Female  | 23 | 1 | 47 | 32 | 2,39 | 5    | 3,5  | 3   | 19 | 37 | 8  | 8  | 10 | 7  | 10 | 4   | 12 |
| 723 | Male    | 19 | 1 | 49 | 20 | 2,67 | 3,83 | 2    | 2,8 | 31 | 39 | 11 | 7  | 10 | 9  | 13 | 3,1 | 11 |
| 724 | Male    | 21 | 3 | 51 | 14 | 2,28 | 4,67 | 3,5  | 3   | 16 | 24 | 4  | 8  | 7  | 10 | 14 | 3,1 | 9  |
| 725 | Male    | 19 | 3 | 52 | 21 | 2,56 | 3,67 | 2,5  | 2,8 | 25 | 27 | 12 | 7  | 11 | 10 | 9  | 2,6 | 6  |
| 726 | Female  | 19 | 3 | 30 | 33 | 4    | 3,33 | 2,5  | 5   | 18 | 28 | 3  | 8  | 12 | 2  | 13 | 1,5 | 3  |
| 727 | Female  | 21 | 3 | 38 | 21 | 2,61 | 2    | 2,5  | 2,4 | 31 | 42 | 8  | 12 | 8  | 8  | 8  | 2,1 | 10 |
| 728 | Female  | 18 | 1 | 53 | 25 | 2,28 | 3,5  | 3,5  | 3,6 | 20 | 18 | 9  | 8  | 12 | 11 | 8  | 2,6 | 9  |
| 729 | Female  | 19 | 2 | 49 | 19 | 2,06 | 4,17 | 4,25 | 2,8 | 31 | 40 | 14 | 7  | 9  | 4  | 10 | 2,1 | 12 |
| 730 | Female  | 21 | 2 | 38 | 29 | 2,56 | 3,5  | 2    | 3,8 | 27 | 25 | 7  | 10 | 11 | 6  | 12 | 2,7 | 4  |
| 731 | Female  | 19 | 2 | 53 | 18 | 2,61 | 3,33 | 1,75 | 4   | 21 | 30 | 7  | 9  | 14 | 9  | 12 | 3,3 | 10 |
| 732 | Female  | 21 | 3 | 43 | 20 | 2,61 | 2,33 | 1    | 3,6 | 22 | 36 | 9  | 11 | 13 | 8  | 12 | 2,7 | 11 |
| 733 | Female  | 22 | 2 | 22 | 24 | 4,22 | 5    | 3,5  | 4,8 | 46 | 29 | 5  | 8  | 6  | 2  | 14 | 1,8 | 12 |
| 734 | Female  | 28 | 4 | 55 | 25 | 3,28 | 3,33 | 1,75 | 3,6 | 30 | 45 | 14 | 9  | 9  | 9  | 12 | 3,5 | 12 |
| 735 | Male    | 25 | 4 | 41 | 31 | 2,72 | 1,5  | 2    | 3,8 | 32 | 37 | 13 | 7  | 8  | 6  | 13 | 3   | 12 |
| 736 | Female  | 17 | 1 | 56 | 8  | 2,28 | 3,5  | 2    | 3,2 | 21 | 36 | 11 | 8  | 12 | 11 | 9  | 3,1 | 12 |
| 737 | Female  | 20 | 2 | 50 | 14 | 3    | 2,67 | 2,75 | 2,8 | 25 | 32 | 10 | 9  | 12 | 9  | 7  | 2,7 | 8  |
| 738 | Female  | 20 | 1 | 42 | 27 | 3,67 | 4,33 | 3    | 3,8 | 23 | 23 | 8  | 8  | 8  | 6  | 7  | 2,4 | 6  |
| 739 | Male    | 19 | 1 | 50 | 22 | 2,5  | 3,83 | 2    | 2,2 | 26 | 30 | 9  | 7  | 11 | 4  | 11 | 3,2 | 7  |
| 740 | Male    | 24 | 4 | 44 | 18 | 2,67 | 4,17 | 3,25 | 2,4 | 18 | 33 | 7  | 7  | 11 | 9  | 10 | 3   | 6  |
| 741 | Female  | 20 | 1 | 55 | 13 | 2,44 | 4,17 | 2,5  | 3   | 20 | 33 | 7  | 8  | 9  | 11 | 9  | 3,2 | 11 |
| 742 | Female  | 24 | 4 | 32 | 20 | 3,06 | 3,83 | 2,5  | 3,2 | 23 | 32 | 4  | 8  | 11 | 7  | 8  | 2,5 | 7  |
| 743 | Female  | 18 | 1 | 50 | 24 | 2,5  | 4,5  | 3    | 3,2 | 28 | 37 | 4  | 8  | 12 | 7  | 8  | 2,3 | 9  |
| 744 | Male    | 21 | 3 | 50 | 23 | 3,22 | 3,67 | 3,25 | 4   | 17 | 35 | 8  | 8  | 10 | 9  | 11 | 2,5 | 9  |
| 745 | Female  | 19 | 2 | 45 | 25 | 3    | 1    | 2    | 2,8 | 26 | 29 | 3  | 7  | 13 | 10 | 13 | 2   | 6  |
| 746 | Female  | 19 | 2 | 41 | 21 | 3,39 | 3,67 | 4    | 3   | 21 | 28 | 7  | 10 | 10 | 6  | 8  | 2,4 | 9  |
| 747 | Female  | 20 | 2 | 51 | 25 | 2,33 | 3,17 | 2,5  | 2,2 | 23 | 33 | 9  | 9  | 10 | 10 | 11 | 2,9 | 9  |
| 748 | Female  | 21 | 1 | 44 | 26 | 2,83 | 4,5  | 3,5  | 4,4 | 25 | 33 | 11 | 8  | 13 | 5  | 14 | 3,4 | 9  |
| 749 | Neutral | 19 | 1 | 48 | 28 | 2,5  | 3    | 2,25 | 2,6 | 36 | 43 | 8  | 8  | 8  | 10 | 14 | 2,2 | 9  |
| 750 | Male    | 26 | 4 | 36 | 35 | 3,11 | 3,5  | 3,5  | 3,4 | 32 | 34 | 14 | 8  | 11 | 6  | 14 | 2,5 | 7  |
| 751 | Female  | 21 | 1 | 53 | 22 | 2,78 | 4,5  | 3    | 3,4 | 22 | 37 | 10 | 10 | 13 | 4  | 14 | 3,8 | 8  |
| 752 | Female  | 20 | 2 | 43 | 25 | 3,17 | 3,33 | 2,75 | 2,6 | 33 | 29 | 5  | 10 | 9  | 5  | 11 | 1,7 | 11 |
| 753 | Female  | 20 | 2 | 60 | 13 | 2,11 | 3    | 1,5  | 2,4 | 25 | 41 | 13 | 10 | 14 | 9  | 12 | 3,1 | 12 |
| 754 | Female  | 23 | 1 | 36 | 34 | 2,56 | 3,67 | 2,25 | 3,2 | 27 | 34 | 11 | 4  | 5  | 4  | 10 | 1,7 | 9  |
| 755 | Female  | 24 | 2 | 40 | 23 | 2,78 | 3,67 | 3,25 | 3,6 | 26 | 26 | 13 | 12 | 11 | 6  | 12 | 2,8 | 10 |
| 756 | Male    | 23 | 3 | 42 | 19 | 1,67 | 3    | 1,75 | 3,2 | 23 | 36 | 9  | 8  | 14 | 12 | 13 | 2,9 | 11 |
| 757 | Female  | 20 | 2 | 35 | 27 | 2,56 | 3,67 | 3    | 2,4 | 25 | 26 | 3  | 8  | 9  | 5  | 11 | 2,6 | 8  |
| 758 | Female  | 21 | 3 | 32 | 28 | 3,39 | 5    | 5    | 5   | 21 | 22 | 8  | 8  | 10 | 8  | 9  | 2,7 | 10 |
| 759 | Female  | 22 | 4 | 52 | 19 | 3    | 3,33 | 3    | 3,8 | 22 | 33 | 7  | 8  | 12 | 7  | 11 | 3,2 | 12 |
| 760 | Female  | 20 | 1 | 30 | 36 | 3,11 | 4    | 1,75 | 4   | 31 | 30 | 6  | 14 | 11 | 5  | 12 | 1,5 | 8  |
| 761 | Female  | 18 | 2 | 36 | 32 | 2,67 | 4,17 | 4,5  | 3,8 | 34 | 30 | 8  | 8  | 13 | 2  | 13 | 1,6 | 6  |
| 762 | Female  | 18 | 2 | 43 | 31 | 2,83 | 2,67 | 3,25 | 3,4 | 20 | 33 | 9  | 9  | 12 | 8  | 12 | 2,7 | 9  |
| 763 | Female  | 18 | 2 | 36 | 26 | 3,5  | 3    | 2,75 | 4,8 | 34 | 20 | 11 | 6  | 11 | 6  | 13 | 2   | 7  |
| 764 | Male    | 19 | 2 | 36 | 28 | 3,17 | 3,83 | 2,75 | 3,6 | 22 | 29 | 3  | 10 | 9  | 7  | 10 | 2,7 | 8  |
| 765 | Female  | 21 | 2 | 40 | 18 | 2,5  | 2,83 | 1,5  | 3   | 24 | 27 | 12 | 7  | 6  | 10 | 10 | 2,4 | 5  |
| 766 | Female  | 19 | 3 | 42 | 18 | 2,06 | 2,67 | 1,25 | 1,4 | 23 | 37 | 5  | 7  | 14 | 7  | 13 | 3   | 12 |

|     |        |    |   |    |    |      |      |      |     |    |    |    |    |    |    |    |     |    |
|-----|--------|----|---|----|----|------|------|------|-----|----|----|----|----|----|----|----|-----|----|
| 767 | Male   | 22 | 1 | 43 | 19 | 2,11 | 3,5  | 1,25 | 2,8 | 22 | 29 | 8  | 8  | 13 | 4  | 9  | 2,4 | 7  |
| 768 | Female | 20 | 4 | 51 | 21 | 2,44 | 2    | 1,5  | 3,6 | 30 | 39 | 8  | 7  | 11 | 5  | 8  | 2,8 | 10 |
| 769 | Female | 18 | 1 | 69 | 3  | 2,56 | 2,83 | 2,25 | 3   | 19 | 41 | 10 | 9  | 13 | 14 | 13 | 4   | 12 |
| 770 | Female | 19 | 1 | 52 | 19 | 3    | 4,17 | 2,75 | 2,8 | 24 | 39 | 7  | 12 | 9  | 6  | 10 | 2,2 | 11 |
| 771 | Female | 20 | 2 | 52 | 31 | 3,39 | 2,67 | 2,75 | 5   | 36 | 33 | 7  | 8  | 14 | 7  | 11 | 2,5 | 10 |
| 772 | Female | 24 | 2 | 48 | 13 | 2    | 3,5  | 1,5  | 3,2 | 20 | 34 | 12 | 8  | 14 | 8  | 13 | 3,3 | 12 |
| 773 | Male   | 18 | 1 | 55 | 10 | 2,28 | 3    | 1,5  | 2,6 | 18 | 33 | 14 | 9  | 10 | 13 | 7  | 3,3 | 10 |
| 774 | Male   | 21 | 4 | 65 | 7  | 1,5  | 1,67 | 1    | 1   | 22 | 41 | 8  | 7  | 14 | 14 | 10 | 3,9 | 12 |
| 775 | Female | 21 | 3 | 51 | 8  | 2,44 | 3,17 | 1    | 4,6 | 23 | 41 | 2  | 9  | 10 | 3  | 9  | 3,1 | 11 |
| 776 | Female | 19 | 1 | 59 | 10 | 1,5  | 1,5  | 2,5  | 3   | 19 | 44 | 12 | 8  | 14 | 8  | 14 | 3,8 | 10 |
| 777 | Male   | 24 | 2 | 57 | 14 | 3,06 | 1,5  | 1,5  | 3,4 | 19 | 33 | 10 | 7  | 11 | 13 | 11 | 3,6 | 9  |
| 778 | Female | 20 | 2 | 56 | 16 | 1,72 | 2,67 | 1    | 3   | 14 | 27 | 9  | 7  | 13 | 9  | 11 | 3,6 | 12 |
| 779 | Female | 20 | 2 | 45 | 18 | 2,11 | 2,33 | 2,5  | 2   | 19 | 30 | 8  | 8  | 12 | 10 | 10 | 2,9 | 7  |
| 780 | Female | 20 | 2 | 52 | 18 | 2,33 | 3,5  | 4,5  | 3,6 | 23 | 31 | 10 | 6  | 13 | 6  | 9  | 2,6 | 7  |
| 781 | Female | 19 | 3 | 52 | 29 | 2,83 | 2    | 1    | 1,8 | 27 | 29 | 12 | 10 | 7  | 10 | 12 | 2,9 | 9  |
| 782 | Female | 18 | 2 | 40 | 21 | 2,22 | 4,17 | 2    | 4,8 | 24 | 35 | 12 | 10 | 12 | 7  | 10 | 3,2 | 7  |
| 783 | Female | 19 | 2 | 37 | 31 | 3,67 | 4    | 4    | 5   | 21 | 30 | 10 | 9  | 9  | 8  | 8  | 3   | 9  |
| 784 | Male   | 28 | 3 | 41 | 26 | 2,78 | 4,17 | 2,75 | 4,8 | 25 | 35 | 7  | 5  | 13 | 13 | 14 | 2,8 | 11 |
| 785 | Female | 24 | 4 | 56 | 15 | 2,39 | 2,5  | 3    | 3,4 | 21 | 30 | 11 | 9  | 9  | 11 | 10 | 3   | 10 |
| 786 | Female | 18 | 1 | 50 | 16 | 2,83 | 1,33 | 1    | 4,2 | 25 | 33 | 7  | 9  | 13 | 8  | 8  | 2,7 | 11 |
| 787 | Female | 22 | 3 | 50 | 19 | 2,94 | 3    | 3,25 | 3,8 | 26 | 33 | 9  | 8  | 13 | 8  | 6  | 2,9 | 9  |
| 788 | Female | 20 | 3 | 44 | 24 | 2,28 | 4,33 | 2,5  | 3,4 | 28 | 32 | 7  | 8  | 12 | 5  | 9  | 3,2 | 7  |
| 789 | Female | 19 | 1 | 62 | 10 | 2,22 | 3,5  | 1    | 1,2 | 21 | 40 | 7  | 10 | 13 | 12 | 11 | 3,4 | 12 |
| 790 | Female | 19 | 1 | 31 | 29 | 3,22 | 4,33 | 3,25 | 5   | 28 | 22 | 9  | 8  | 11 | 4  | 9  | 2   | 9  |
| 791 | Female | 19 | 1 | 48 | 27 | 2,39 | 2,33 | 1,5  | 2,8 | 19 | 29 | 7  | 7  | 12 | 7  | 10 | 2,9 | 12 |
| 792 | Female | 19 | 1 | 55 | 19 | 3    | 2    | 1    | 3   | 28 | 38 | 9  | 8  | 10 | 10 | 12 | 2,9 | 12 |
| 793 | Female | 19 | 1 | 48 | 15 | 2,44 | 2,83 | 1    | 1,8 | 23 | 40 | 11 | 7  | 13 | 11 | 12 | 3,6 | 9  |
| 794 | Male   | 18 | 2 | 51 | 16 | 1,83 | 3,67 | 1,5  | 3   | 20 | 30 | 13 | 8  | 5  | 6  | 12 | 3,2 | 9  |
| 795 | Female | 19 | 1 | 47 | 26 | 2,61 | 1    | 1,75 | 2,2 | 24 | 32 | 13 | 9  | 10 | 3  | 14 | 2,2 | 12 |
| 796 | Female | 21 | 2 | 50 | 23 | 2,22 | 2,17 | 1,25 | 4   | 22 | 33 | 7  | 9  | 13 | 10 | 11 | 2,7 | 12 |
| 797 | Female | 19 | 1 | 43 | 19 | 2,89 | 3,67 | 1,5  | 3,8 | 21 | 30 | 10 | 9  | 12 | 8  | 12 | 2,7 | 8  |
| 798 | Male   | 19 | 1 | 56 | 10 | 1,67 | 1,33 | 1    | 2,8 | 17 | 29 | 14 | 9  | 12 | 13 | 12 | 3,6 | 12 |
| 799 | Male   | 25 | 4 | 46 | 21 | 2,11 | 1    | 1,75 | 2   | 24 | 36 | 5  | 9  | 13 | 9  | 10 | 3   | 9  |
| 800 | Female | 27 | 2 | 52 | 21 | 3    | 3    | 2,75 | 3,4 | 25 | 39 | 6  | 8  | 10 | 6  | 10 | 2,3 | 8  |
| 801 | Male   | 27 | 1 | 42 | 29 | 2,33 | 3,83 | 1,75 | 4   | 27 | 29 | 12 | 9  | 8  | 12 | 13 | 3   | 12 |
| 802 | Female | 19 | 1 | 47 | 15 | 2,33 | 2,67 | 2,25 | 2,6 | 27 | 30 | 10 | 8  | 8  | 5  | 12 | 2,5 | 9  |
| 803 | Female | 19 | 1 | 56 | 12 | 2,28 | 2,5  | 1    | 1   | 22 | 38 | 13 | 10 | 10 | 9  | 11 | 3,3 | 12 |
| 804 | Female | 23 | 4 | 48 | 23 | 2,83 | 2,33 | 1    | 3,6 | 18 | 32 | 4  | 6  | 14 | 7  | 11 | 3,5 | 6  |
| 805 | Male   | 20 | 1 | 59 | 4  | 2,39 | 1,83 | 2,5  | 2,2 | 18 | 22 | 11 | 8  | 10 | 12 | 10 | 3,2 | 8  |
| 806 | Female | 20 | 2 | 33 | 30 | 3,67 | 3,5  | 3,25 | 5   | 24 | 27 | 8  | 8  | 10 | 8  | 10 | 2,4 | 10 |
| 807 | Male   | 20 | 1 | 54 | 11 | 2,44 | 2    | 1,25 | 2   | 16 | 26 | 13 | 7  | 13 | 9  | 13 | 3,6 | 12 |
| 808 | Female | 21 | 2 | 39 | 26 | 3,11 | 4,5  | 2,5  | 2,2 | 25 | 32 | 8  | 9  | 10 | 6  | 9  | 2,3 | 9  |
| 809 | Female | 21 | 2 | 41 | 22 | 3    | 1,67 | 2,25 | 2,2 | 29 | 31 | 11 | 9  | 13 | 11 | 12 | 3,2 | 12 |
| 810 | Female | 20 | 1 | 53 | 11 | 2,28 | 2,67 | 1,25 | 2,8 | 18 | 31 | 13 | 8  | 14 | 11 | 10 | 3,1 | 12 |
| 811 | Female | 20 | 1 | 54 | 23 | 3,17 | 3,83 | 4,25 | 3,8 | 24 | 31 | 6  | 7  | 6  | 12 | 13 | 2,4 | 6  |
| 812 | Female | 22 | 4 | 54 | 20 | 2,33 | 1,33 | 2,75 | 3   | 17 | 29 | 10 | 9  | 9  | 8  | 12 | 3   | 12 |
| 813 | Female | 23 | 4 | 43 | 18 | 2,44 | 1    | 1,75 | 1,4 | 21 | 37 | 7  | 7  | 14 | 3  | 14 | 3   | 9  |
| 814 | Female | 22 | 3 | 55 | 20 | 2,78 | 3    | 1,75 | 2,8 | 16 | 33 | 11 | 8  | 9  | 9  | 12 | 3,3 | 11 |
| 815 | Female | 20 | 2 | 53 | 17 | 2,06 | 2    | 2    | 2,8 | 19 | 31 | 11 | 9  | 12 | 10 | 10 | 3,1 | 9  |
| 816 | Male   | 20 | 1 | 53 | 16 | 2,17 | 2,83 | 1    | 4   | 17 | 23 | 8  | 8  | 11 | 11 | 8  | 3,1 | 8  |
| 817 | Female | 20 | 2 | 56 | 16 | 1,44 | 2,5  | 1    | 1   | 20 | 34 | 6  | 8  | 13 | 11 | 9  | 3,4 | 9  |
| 818 | Female | 20 | 2 | 29 | 22 | 2,39 | 1    | 1,75 | 1,6 | 20 | 28 | 10 | 10 | 12 | 8  | 12 | 3   | 12 |
| 819 | Male   | 33 | 2 | 58 | 18 | 2,94 | 3,67 | 3,75 | 3,8 | 29 | 34 | 12 | 6  | 12 | 12 | 12 | 3,3 | 12 |
| 820 | Female | 24 | 4 | 57 | 12 | 1,94 | 1,83 | 1    | 2,8 | 18 | 42 | 6  | 8  | 14 | 12 | 13 | 3,5 | 12 |
| 821 | Female | 18 | 1 | 48 | 19 | 2,89 | 3,67 | 1,75 | 4   | 30 | 40 | 7  | 9  | 14 | 11 | 11 | 2,8 | 8  |
| 822 | Female | 17 | 1 | 53 | 16 | 2,39 | 2    | 2,25 | 4   | 20 | 37 | 13 | 8  | 14 | 8  | 14 | 3   | 12 |
| 823 | Female | 18 | 2 | 43 | 23 | 2,44 | 2,17 | 2,5  | 4   | 26 | 33 | 9  | 7  | 10 | 6  | 8  | 2,7 | 7  |
| 824 | Female | 17 | 1 | 49 | 16 | 2,33 | 1,83 | 1,5  | 2,6 | 20 | 39 | 8  | 8  | 14 | 9  | 11 | 3,2 | 8  |
| 825 | Male   | 19 | 2 | 49 | 10 | 1,17 | 1    | 1    | 2   | 24 | 40 | 14 | 8  | 14 | 10 | 13 | 3,8 | 12 |
| 826 | Female | 21 | 2 | 44 | 27 | 3,33 | 4    | 3,25 | 4,8 | 24 | 29 | 14 | 8  | 4  | 11 | 8  | 2,4 | 7  |
| 827 | Male   | 21 | 2 | 34 | 32 | 2,67 | 1    | 1,75 | 3,2 | 30 | 31 | 8  | 4  | 10 | 5  | 10 | 2,7 | 6  |
| 828 | Female | 19 | 2 | 47 | 14 | 1,94 | 1,67 | 1,5  | 2,2 | 24 | 28 | 9  | 8  | 12 | 12 | 10 | 3,1 | 12 |
| 829 | Female | 18 | 2 | 43 | 11 | 1,83 | 1    | 1    | 3,4 | 23 | 35 | 9  | 8  | 13 | 13 | 13 | 3,3 | 9  |
| 830 | Female | 18 | 2 | 49 | 22 | 2,56 | 1,67 | 2    | 4,4 | 21 | 42 | 14 | 7  | 9  | 11 | 8  | 3,3 | 10 |

|     |        |    |   |    |    |      |      |      |     |    |    |    |    |    |    |    |     |    |
|-----|--------|----|---|----|----|------|------|------|-----|----|----|----|----|----|----|----|-----|----|
| 831 | Male   | 18 | 2 | 43 | 23 | 2,5  | 3,83 | 1,75 | 4,4 | 22 | 27 | 10 | 9  | 10 | 7  | 10 | 2,7 | 8  |
| 832 | Male   | 17 | 1 | 44 | 24 | 2,83 | 3,5  | 2,75 | 4,6 | 24 | 26 | 6  | 7  | 10 | 10 | 10 | 2,6 | 8  |
| 833 | Female | 17 | 1 | 60 | 15 | 1,94 | 3    | 1    | 4   | 18 | 23 | 8  | 8  | 13 | 7  | 9  | 3,1 | 10 |
| 834 | Female | 17 | 1 | 58 | 17 | 2,61 | 3,33 | 1,75 | 4,6 | 23 | 31 | 13 | 9  | 13 | 14 | 12 | 3,4 | 12 |
| 835 | Female | 19 | 2 | 45 | 23 | 2,33 | 2,5  | 1,5  | 4,2 | 27 | 41 | 12 | 9  | 14 | 9  | 13 | 3,4 | 7  |
| 836 | Female | 18 | 2 | 48 | 22 | 2    | 1,33 | 1,5  | 2,4 | 23 | 29 | 7  | 9  | 14 | 9  | 12 | 2,7 | 10 |
| 837 | Female | 19 | 2 | 42 | 27 | 3,28 | 2,5  | 1,5  | 3,6 | 25 | 27 | 9  | 9  | 9  | 8  | 12 | 2,2 | 9  |
| 838 | Female | 20 | 2 | 62 | 35 | 3,33 | 4,83 | 3,25 | 4,8 | 32 | 30 | 9  | 9  | 14 | 9  | 12 | 2,1 | 4  |
| 839 | Female | 23 | 4 | 51 | 25 | 2,94 | 2,17 | 1,5  | 3,8 | 23 | 35 | 10 | 8  | 12 | 7  | 11 | 2,8 | 12 |
| 840 | Female | 17 | 1 | 54 | 16 | 2,22 | 3,5  | 1,25 | 3,8 | 23 | 38 | 13 | 9  | 11 | 10 | 10 | 3,2 | 12 |
| 841 | Female | 19 | 3 | 54 | 11 | 2,11 | 3,17 | 1,75 | 3,8 | 22 | 37 | 10 | 8  | 13 | 10 | 13 | 3,8 | 11 |
| 842 | Female | 19 | 2 | 35 | 28 | 3,89 | 2    | 3    | 3,4 | 28 | 30 | 8  | 10 | 9  | 2  | 6  | 1,7 | 8  |
| 843 | Female | 18 | 1 | 52 | 20 | 2,5  | 1,67 | 1    | 1,6 | 30 | 31 | 8  | 9  | 5  | 3  | 6  | 2,4 | 11 |
| 844 | Female | 20 | 4 | 59 | 16 | 2,67 | 3,67 | 1    | 3,6 | 25 | 38 | 12 | 7  | 13 | 8  | 12 | 3,4 | 11 |
| 845 | Female | 21 | 3 | 37 | 30 | 3,39 | 3,33 | 3    | 3,8 | 26 | 30 | 9  | 10 | 9  | 7  | 10 | 1,9 | 8  |
| 846 | Female | 19 | 1 | 55 | 12 | 2,11 | 2    | 2    | 2   | 22 | 32 | 11 | 9  | 14 | 13 | 11 | 3,1 | 12 |
| 847 | Female | 18 | 1 | 43 | 20 | 2,89 | 1,83 | 1    | 3,2 | 20 | 29 | 9  | 8  | 11 | 13 | 8  | 3   | 9  |
| 848 | Female | 19 | 2 | 49 | 18 | 2,28 | 3,83 | 3    | 3,6 | 23 | 33 | 13 | 9  | 13 | 13 | 10 | 3,2 | 10 |
| 849 | Female | 18 | 2 | 50 | 28 | 1,89 | 4,83 | 1,75 | 3   | 25 | 29 | 8  | 6  | 8  | 9  | 13 | 3   | 5  |
| 850 | Female | 19 | 2 | 55 | 22 | 2,39 | 1,5  | 1    | 2,8 | 25 | 42 | 14 | 8  | 14 | 12 | 14 | 4   | 11 |
| 851 | Male   | 18 | 2 | 60 | 12 | 2,22 | 1,33 | 1,75 | 2,8 | 21 | 33 | 9  | 7  | 12 | 11 | 10 | 3,2 | 9  |
| 852 | Female | 21 | 4 | 53 | 11 | 2,06 | 2    | 1    | 3,6 | 19 | 40 | 8  | 7  | 13 | 8  | 6  | 3,9 | 10 |
| 853 | Female | 18 | 1 | 58 | 22 | 2,94 | 1,33 | 1    | 4   | 25 | 38 | 11 | 8  | 9  | 7  | 12 | 2,8 | 12 |
| 854 | Female | 18 | 1 | 59 | 9  | 2,11 | 2,17 | 1,5  | 2   | 17 | 34 | 8  | 7  | 13 | 12 | 8  | 3,2 | 10 |
| 855 | Female | 17 | 1 | 61 | 12 | 2,5  | 1,67 | 1,5  | 1   | 21 | 43 | 11 | 10 | 13 | 12 | 13 | 3   | 12 |
| 856 | Female | 22 | 2 | 44 | 30 | 2,89 | 3,67 | 3,5  | 3,6 | 26 | 33 | 12 | 9  | 11 | 10 | 10 | 2,7 | 9  |
| 857 | Female | 19 | 1 | 58 | 13 | 2,39 | 1    | 1    | 2,6 | 19 | 24 | 10 | 8  | 14 | 12 | 9  | 3,3 | 9  |
| 858 | Female | 26 | 2 | 57 | 19 | 2,78 | 2,33 | 1,25 | 4,2 | 28 | 39 | 12 | 8  | 11 | 7  | 12 | 2,9 | 12 |
| 859 | Female | 41 | 2 | 65 | 14 | 1,44 | 2,67 | 2    | 3   | 23 | 46 | 11 | 10 | 13 | 10 | 10 | 3,8 | 12 |
| 860 | Female | 22 | 2 | 52 | 20 | 3,06 | 1,5  | 2,5  | 3,2 | 26 | 41 | 10 | 9  | 9  | 5  | 4  | 2,7 | 5  |
| 861 | Female | 21 | 1 | 22 | 31 | 3,89 | 1,83 | 4    | 5   | 31 | 22 | 3  | 9  | 13 | 7  | 9  | 1,3 | 3  |
| 862 | Female | 41 | 2 | 55 | 9  | 2,22 | 1,83 | 1,25 | 2   | 17 | 30 | 12 | 12 | 9  | 11 | 6  | 3,1 | 12 |
| 863 | Female | 21 | 2 | 39 | 21 | 3    | 3    | 3    | 3   | 30 | 27 | 9  | 8  | 8  | 8  | 8  | 2,6 | 6  |
| 864 | Female | 34 | 2 | 43 | 22 | 3    | 3,17 | 2,25 | 3,6 | 37 | 30 | 12 | 7  | 9  | 7  | 10 | 2,5 | 9  |
| 865 | Female | 31 | 1 | 55 | 17 | 2,22 | 2,67 | 2,25 | 3,4 | 24 | 34 | 13 | 7  | 14 | 12 | 12 | 3,3 | 11 |
| 866 | Female | 35 | 2 | 47 | 24 | 2,39 | 3,5  | 3,75 | 3,8 | 25 | 34 | 10 | 7  | 11 | 8  | 11 | 3,2 | 7  |
| 867 | Female | 22 | 2 | 53 | 14 | 3,33 | 1,67 | 2,75 | 3,6 | 17 | 37 | 6  | 7  | 13 | 7  | 13 | 2,7 | 10 |
| 868 | Female | 24 | 2 | 51 | 20 | 2,11 | 1,33 | 1    | 1,6 | 27 | 31 | 12 | 9  | 12 | 8  | 12 | 2,9 | 11 |
| 869 | Female | 47 | 2 | 57 | 14 | 2,67 | 1,83 | 1,5  | 3   | 21 | 41 | 12 | 8  | 13 | 14 | 12 | 3,7 | 10 |
| 870 | Female | 20 | 2 | 48 | 15 | 2,5  | 3,17 | 2,25 | 3,4 | 20 | 40 | 13 | 7  | 12 | 14 | 7  | 3,4 | 11 |
| 871 | Female | 40 | 2 | 55 | 11 | 2,17 | 1,67 | 1,5  | 1,2 | 16 | 27 | 13 | 9  | 11 | 16 | 13 | 3,5 | 9  |
| 872 | Female | 21 | 1 | 36 | 32 | 3,94 | 1,67 | 3,75 | 4,6 | 25 | 16 | 6  | 9  | 14 | 9  | 11 | 1,6 | 5  |
| 873 | Female | 18 | 1 | 53 | 18 | 2,56 | 3,33 | 2    | 4   | 19 | 26 | 7  | 9  | 8  | 13 | 9  | 3,1 | 9  |
| 874 | Female | 29 | 1 | 39 | 19 | 2,72 | 3,5  | 4,25 | 3,8 | 31 | 24 | 7  | 9  | 11 | 6  | 11 | 2,4 | 9  |
| 875 | Female | 30 | 2 | 59 | 18 | 2,11 | 2,5  | 1,75 | 3   | 23 | 46 | 11 | 7  | 12 | 12 | 13 | 2,7 | 12 |
